# Supplementary material for: New insights into the photoswitching mechanisms of normal dithienylethenes
Source: Royal Society of Chemistry journal article supplement (doi:10.1039/c6cp03471c), 2016-01-01
Supplement: c6cp03471c1.pdf [file c6cp03471c1.pdf]

## **New insights concerning the photoswitching mechanisms of normal dithienylethene**

I. Hamdi <sup>\*,a,b</sup> G. Buntinx,<sup>a</sup> A. Perrier,<sup>c,d</sup> O. Devos,<sup>a</sup> N. Jaïdane,<sup>b</sup> S. Delbaere,<sup>a</sup> A.K.Tiwari,<sup>a</sup> J. Dubois,<sup>a</sup> M. Takeshita,<sup>e</sup> Y. Wada,<sup>e</sup> and S. Aloïse <sup>\*a</sup>

### **Supporting Information**

**All documents in supporting information will be notice document S.x ( synthesis, MCR-ALS data treatment, derivation of equation...etc); with the same numerotation, table and figure will be notice table S.x and figure S.x.**

## Document S.0. Synthesis of DTE-m5 molecule.

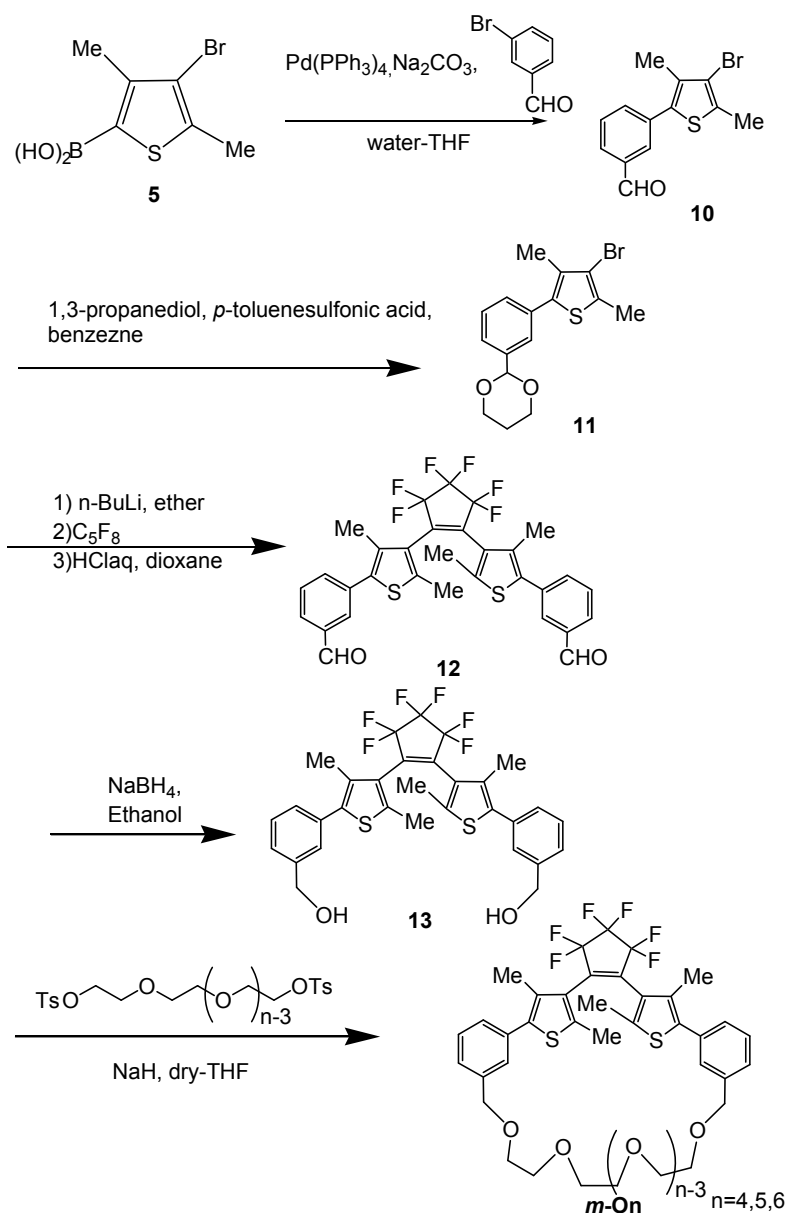

### Preparation of compound **10**

A mixture of 17.0 g of 4-bromo-3,5-dimethylthiophene-2-boronic acid (74.0 mmol), 13.7 g of 3-bromobenzaldehyde (130 mmol), 15.0 g of sodium carbonate (140 mmol), and 1.85 g of tetrakis(triphenylphosphine)palladium (1.6 mmol) in 170 ml of tetrahydrofuran and 85 ml of water was stirred for 12 h at 70 °C. The organic layer was extracted with ethyl acetate, washed with brine, and dried over  $\text{MgSO}_4$ . The solvents were evaporated and the residue was subjected to silica-gel column chromatography. The hexane/ethyl acetate (10:1) eluate was evaporated and 8.6 g of compound **10** (29 mmol) was obtained in 39% yield as colorless prisms.

**10**: colorless prisms, mp 38.6-39.2 °C,  $^1\text{H-NMR}$  (300 MHz, in  $\text{CDCl}_3$ , TMS)  $\delta$  (ppm) 2.30 (3H, s,  $-\text{CH}_3$ ), 2.48 (3H, s,  $-\text{CH}_3$ ), 7.57~7.90 (4H, m, Ar-H), 10.08 (1H, s,  $-\text{CHO}$ ).

### Preparation of compound 11

A mixture of 5.6 g of compound **10** (19 mmol), 4.0 g of 1,3-propanediol (53 mmol), and small piece of p-toluenesulfonic acid in 150 ml of benzene was refluxed with Dean-Stark apparatus for 2h. The mixture was cooled to room temperature and brine was added and the organic layer was separated. The mixture was dried over MgSO<sub>4</sub> and evaporated in vacuo. The residue was recrystallized from hexane to afford 6.2 g of **11** in 89% yield.

**11**: colorless prisms, mp 46.3-47.6 °C, <sup>1</sup>H-NMR (300 MHz, in CDCl<sub>3</sub>, TMS) δ(ppm) 1.50 (1H, d, -CH(-O-)<sub>2</sub>), 2.30 (2H, m, -CH<sub>2</sub>-), 2.30 (3H, s, -CH<sub>3</sub>), 2.44 (3H, s, -CH<sub>3</sub>), 4.00~4.25 (4H, m, -OCH<sub>2</sub>), 7.30~7.50 (4H, m, Ar-H).

### Preparation of compound 12

A solution of 3.27 g of **11** (9.25 mmol) in dry-THF was stirred at -78 °C under Ar and 7.0 ml of *n*-BuLi (1.6M) (11 mmol) was added dropwise by 30 min and the mixture was stirred for 1h at same temperature. To the mixture, 0.33 g of octafluorocyclopentene (1.5 mmol) was slowly added three times and the mixture was stirred overnight. To the reaction mixture, 10 ml of 10% of hydrochloric acid was added and the mixture was stirred for 3h. The aqueous phase was neutralized with sodium bicarbonate and ethyl acetate was added. The organic layer was separated, washed with brine, and dried over MgSO<sub>4</sub>. The solvent was evaporated in vacuo and the residue was subjected to silica-gel column chromatography. Evaporation of ethyl acetate/hexane (4:1) eluate afforded 1.3 g of **12** in 47% yield as blue amorphous.

**12**: blue amorphous, <sup>1</sup>H-NMR (300 MHz, in CDCl<sub>3</sub>, TMS) δ(ppm) 2.11, 2.13 (6H, d, -CH<sub>3</sub>), 2.40 (6H, s, -CH<sub>3</sub>), 7.55~7.86 (8H, m, Ar-H), 10.1 (2H, s, -CHO).

### Preparation of compound 13

To a solution of 384 mg of compound **12** (0.636 mmol) in 10 ml of ethanol, 250 mg of sodium borohydride (6.4 mmol) was added portionwise and the mixture was stirred for 1h at room temperature. The mixture was poured to brine and extracted with ethyl acetate. The organic layer was washed with brine and dried over MgSO<sub>4</sub>. The solvent was evaporated in vacuo and 0.379 g of compound **13** (0.620 mmol) was obtained as colorless amorphous in 98% yield.

**13**: colorless amorphous, <sup>1</sup>H-NMR (300 MHz, in CDCl<sub>3</sub>, TMS) δ(ppm) 2.06, 2.09 (6H, d, -CH<sub>3</sub>), 2.34 (6H, s, -CH<sub>3</sub>), 4.71 (4H, s, -CH<sub>2</sub>-), 7.20~7.50 (8H, m, Ar-H).

### Preparation of *m*-O5

To a refluxing mixture of 200 mg of 60% sodium hydride in 10 ml of dry THF a solution of 114 mg of **13** (0.33 mmol) in 10 ml of dry THF was added dropwise for 6 h and the mixture was refluxed overnight. The mixture was allowed to room temperature and poured into brine and extracted with ethyl acetate. The organic layer was washed with brine and dried over MgSO<sub>4</sub>. The solvent was evaporated in vacuo and the residue was subjected to silica-gel column chromatography. The hexane/acetone (8:3) eluate was evaporated and the residue was subjected to preparative TLC. From one of the bands, 52 mg of *m*-O5 (0.068 mmol) was obtained in 30% yield.

*m*-O5: blue amorphous, <sup>1</sup>H-NMR (300 MHz, in CDCl<sub>3</sub>, TMS) δ(ppm) 2.00 (*p*, 2.9H, s, -CH<sub>3</sub>), 2.02 (*ap*, 3.1H, s, -CH<sub>3</sub>), 2.30 (6H, s, -CH<sub>3</sub>), 3.52~3.57 (16H, m, -O-CH<sub>2</sub>-(CH<sub>2</sub>-O-CH<sub>2</sub>)<sub>3</sub>-CH<sub>2</sub>-O-), 4.61 (4H, m, -CH<sub>2</sub>-), 7.21~7.61 (8H, m, Ar-H).

MS (EI) *m/z*=766 [M<sup>+</sup>].

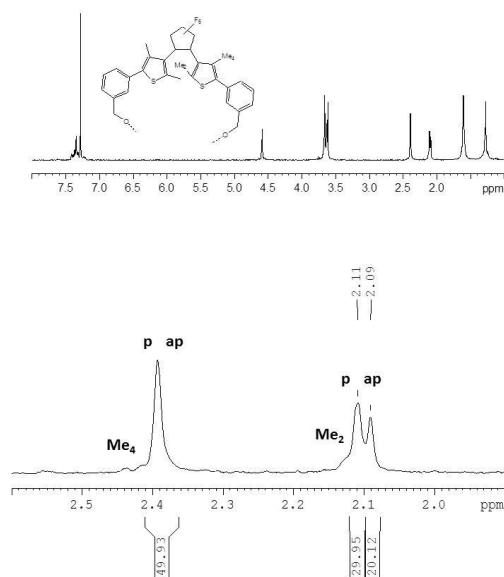

**Figure S.1.**  $^1\text{H}$ NMR methyl signals of DTE-m5 in  $\text{CDCl}_3$

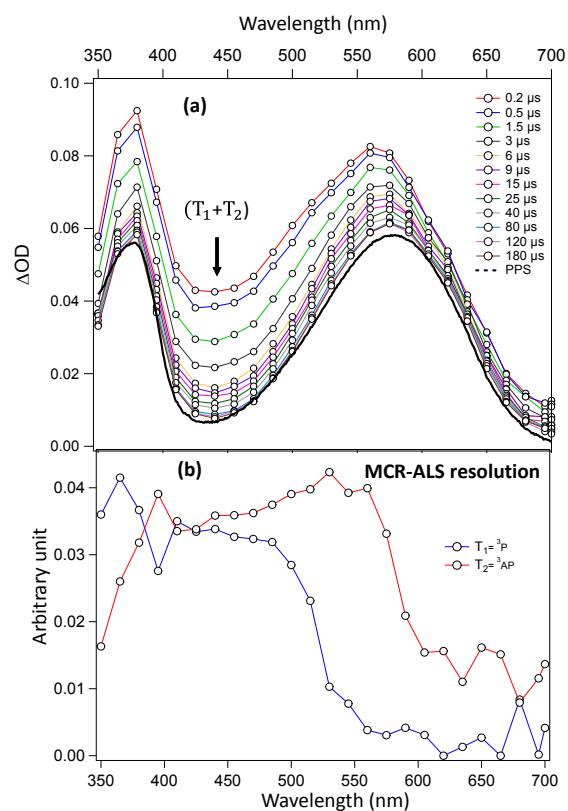

**Figure S.2. (a)** Subpicosecond time-resolved spectra of DTE-m5 in chloroform using 355 nm laser excitation. **(b)** Spectra of triplet state of AP and P conformer respectively obtained by MCR-ALS decomposition.

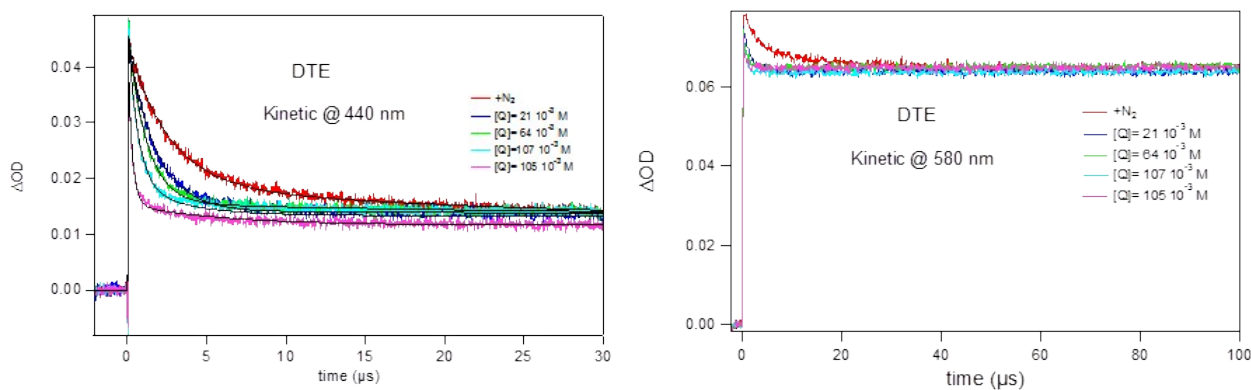

**Figure S.3.** Kinetics obtained from 355 nm laser flash photolysis excitation at 440 nm (left) and at 580 nm (right) for DTE in chloroform for increasing concentration of 2,5-Dimethyl-2,4-hexadiene quencher

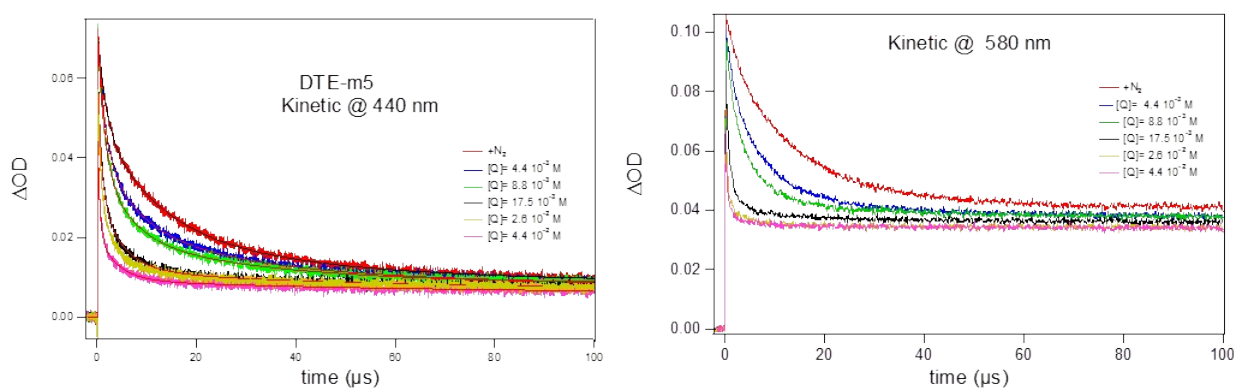

**Figure S.4.** Kinetics obtained from 355 nm laser flash photolysis excitation at 440 nm (left) and at 580 nm (right) for DTE-m5 in chloroform for increasing concentration of 2,5-Dimethyl-2,4-hexadiene quencher.

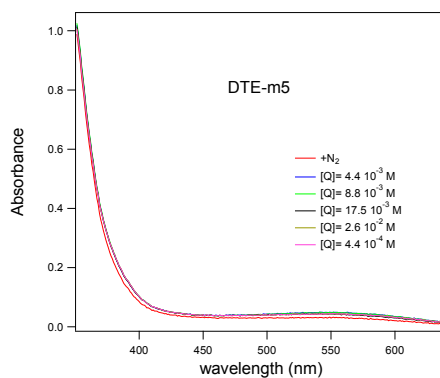

**Figure S.5.** Stationary absorption spectra of DTE-m5 in chloroform for increasing concentration of 2,5-Dimethyl-2,4-hexadiene quencher showing that no photodegradation occurs after each measurements.

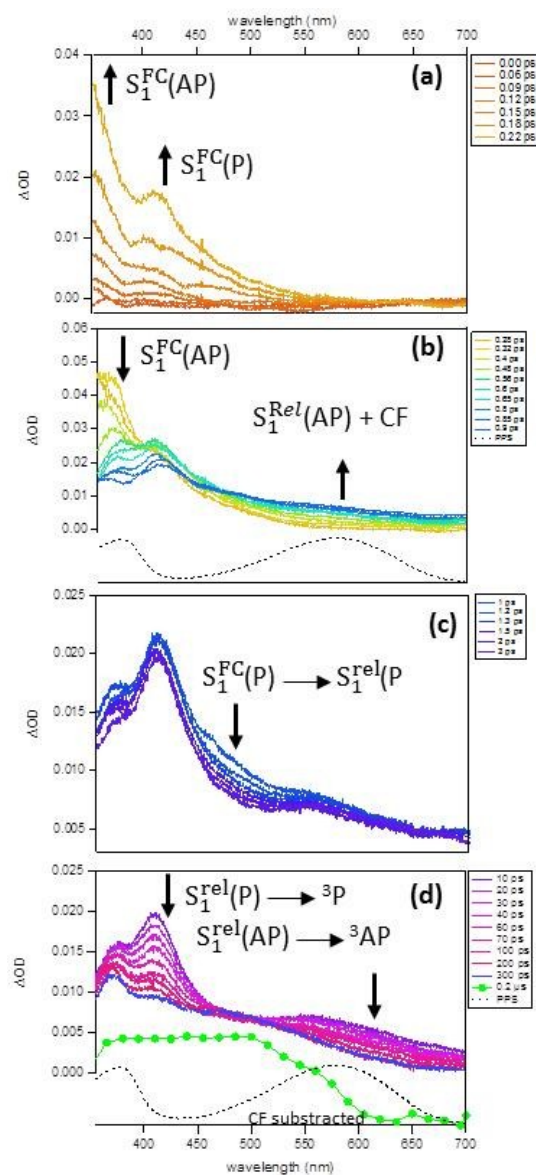

**Figure S.6.** Subpicosecond time-resolved absorption spectra of DTE-m5 in chloroform using 320 nm excitation wavelengths. All spectra are corrected from the GVD.

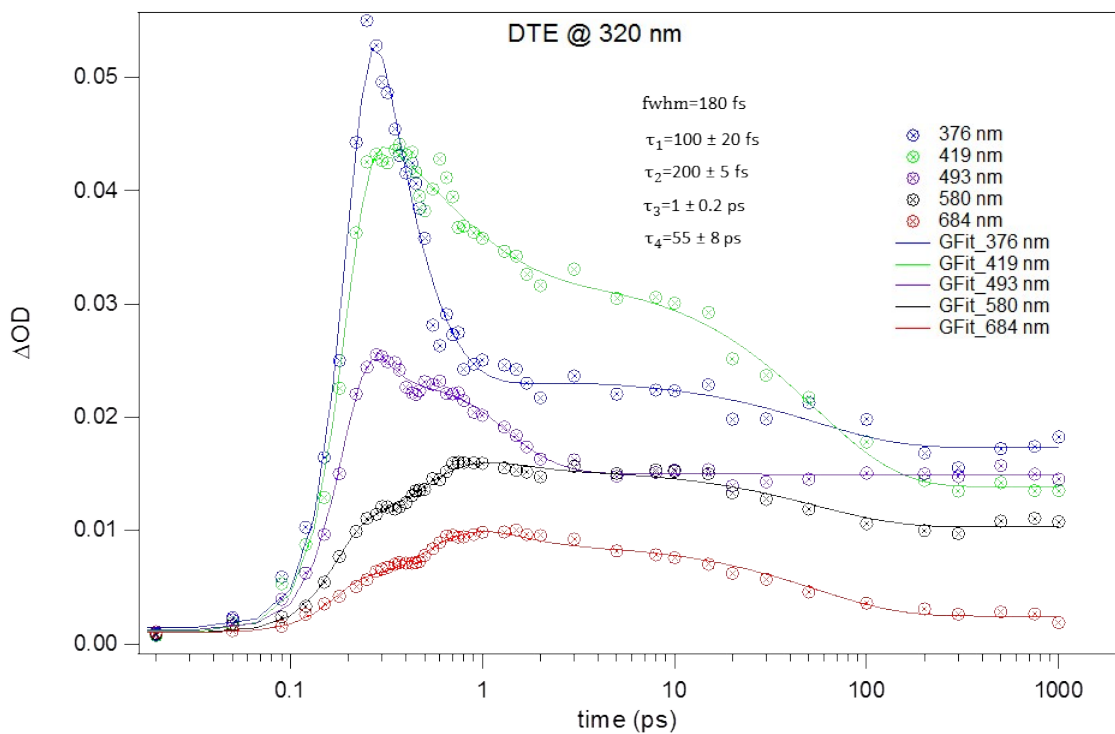

**Figure S.7.** Characteristics life times for different species of DTE obtained by global fitting convoluted with four exponential functions

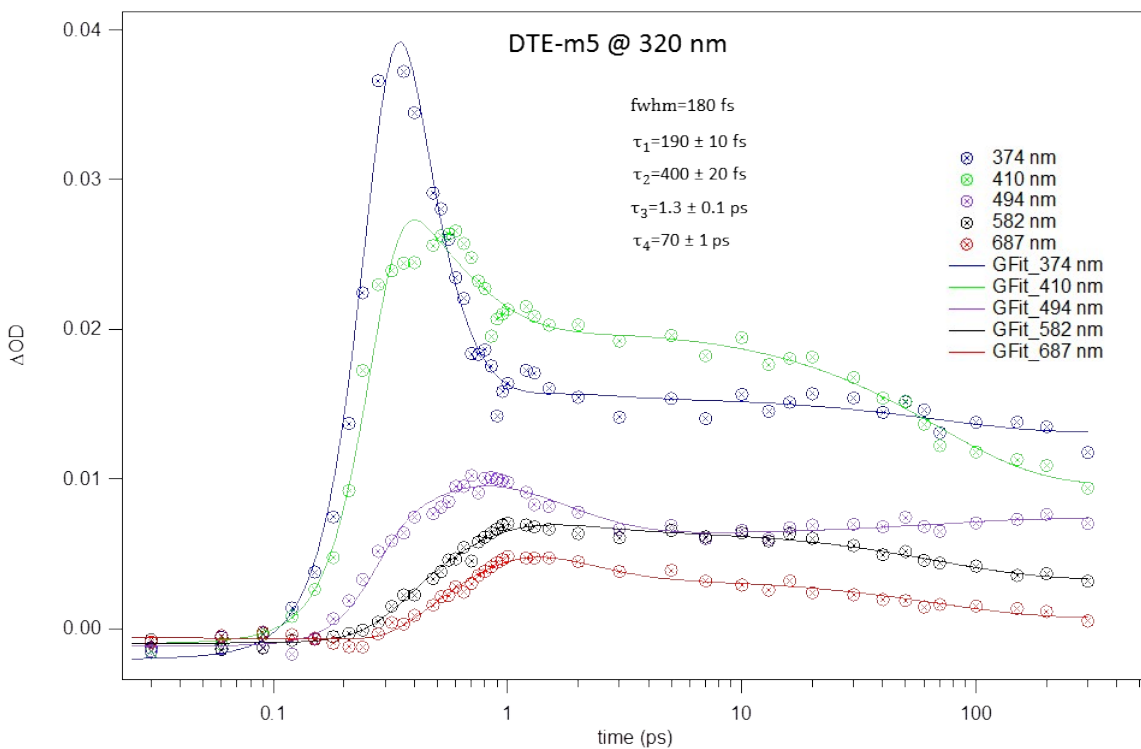

**Figure S.8.** Figure S.7. Characteristics life times for different species of DTE-m5 obtained by global fitting convoluted with four exponential functions

**Document S.9: Full kinetic mechanism including the photocyclization via the triplet state.**

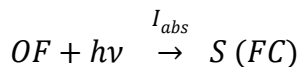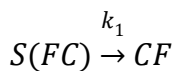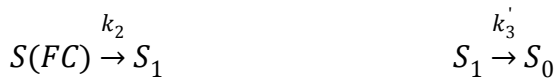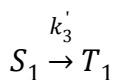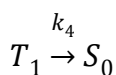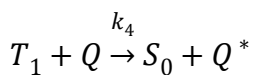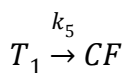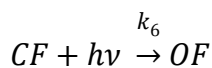

**The kinetic equations are:**

$$\frac{d[S(FC)]}{dt} = I_{abs} - (k_1 + k_2)S(FC) \quad (1)$$

$$\frac{d[S_1]}{dt} = k_2[S(FC)] - k_3[S_1] \quad (2)$$

$$\frac{d[T_1]}{dt} = k_3'[S_1] - (k_4 + k_5 + k_Q[Q]) \quad (3)$$

$$\frac{d[CF]}{dt} = k_1[S(FC)] - k_6[CF] + k_5[T_1] \quad (4)$$

$$\tau_{FC} = \frac{1}{k_1 + k_2} \quad (5)$$

$$\tau_{S_1} = \frac{1}{k_3 + k_3'} \quad (6)$$

$$\tau_T = \frac{1}{k_4 + k_5} \quad (7)$$

**The PPS stationary derives:**

$$[S(FC)] = \frac{I_{abs}}{k_1 + k_2} \quad (8)$$



$$[S_1] = \frac{k_2}{k_3 + k_3'} [S(FC)] = \frac{I_{abs} k_2}{(k_3 + k_3')(k_1 + k_2)} = I_{abs} k_2 \tau_{FC} \tau_{S_1} \quad (9)$$

$$[T_1] = \frac{k_3 [S_1]}{k_T + k_Q [Q]} = \frac{k_2 k_3 I_{abs} \tau_{FC} \tau_{S_1}}{k_T + k_Q [Q]} \quad (10)$$

$$\begin{aligned} [CF] &= \frac{I_{abs} k_1}{k_6 (k_1 + k_2)} + \frac{k_5 k_6 k_3 I_{abs} \tau_{FC} \tau_{S_1}}{k_6 (k_T + k_Q [Q])} \\ &= I_{abs} \frac{k_1}{k_6} \tau_{FC} + \frac{k_2 k_5 k_3 I_{abs} \tau_{FC} \tau_{S_1}}{k_6 (k_T + k_Q [Q])} \end{aligned} \quad (11)$$

**With:**

$$A_Q^\infty = \varepsilon_{CF} l [CF] = \varepsilon_{CF} l I_{abs} \frac{\tau_{FC}}{k_6} \left( k_1 + \frac{k_2 k_3 k_5 \tau_{S_1}}{(k_T + k_Q [Q])} \right)$$

$$\alpha = \varepsilon_{CF} l I_{abs} \frac{\tau_{FC}}{k_6}$$

$$\beta = k_2 k_3 k_5 \tau_{S_1}$$

$$\longrightarrow A_Q^\infty = \alpha \left( k_1 + \frac{\beta}{(k_T + k_Q [Q])} \right) \quad \text{and} \quad A_0^\infty = \alpha \left( k_1 + \frac{\beta}{k_T} \right)$$

$$A_0^\infty - A_Q^\infty = + \frac{\alpha \beta}{k_T} - \frac{\alpha \beta}{(k_T + k_Q [Q])} = \alpha \beta \cdot \frac{k_Q [Q]}{k_T (k_T + k_Q [Q])}$$

$$\frac{A_0^\infty}{A_0^\infty - A_Q^\infty} = \left( 1 + \frac{k_1 k_T}{\beta} \right) \left( 1 + \frac{k_T}{k_Q [Q]} \right)$$

$$\text{If: } \frac{k_1 k_T}{k_2 k_3 k_5 \tau_{S_1}} < 1$$

$$\frac{A_0^\infty}{A_0^\infty - A_Q^\infty} \approx 1 + \frac{k_T}{k_Q [Q]}$$

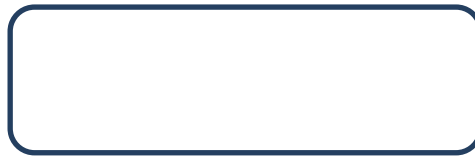

## Document S.10. Multivariate Curve Resolution-Alternating Least Squares (MCR-ALS)

The underlying bilinear model for time-resolved data can be written as the sum of the contributions of the spectra of  $k$  different components related to different absorbing excited state species, weighted by their respective concentration profile.

$$\Delta A(t, \lambda) = \sum_k c_k(t) \varepsilon_k(\lambda) l$$

MCR-ALS has been used in order to recover from the time-resolved data the time profiles and the spectra of the transient species. This method is a soft-modelling method since no assumption on the kinetic model is made; the only assumption is that the data can be described by a bilinear model. In matrix form this model can be written as

$$D = C S^T + E$$

where  $\mathbf{D}(m \times n)$  contains the absorbance value at  $m$  different time delay and for  $n$  different wavelengths,  $\mathbf{C}(m \times k)$  contains the concentration profiles of the  $k$  contributions,  $\mathbf{S}(k \times n)$  contains the spectra of the  $k$  contributions and  $\mathbf{E}(m \times n)$  the residuals.

MCR-ALS is an iterative procedure: first initial estimates are furnished and in a second step the concentration and spectra are recalculated iteratively by applying given constraints until convergence. The lack of fit (l.o.f.) is generally used as a global estimator of the fitting error of the experimental data. Here initial concentrations for each contribution have been estimated using EFA or available knowledge. Applied constraints are non-negativity on concentration and spectra and unimodality on the concentration.

**Document S.11. MCR-ALS resolution of microsecond time-resolved spectra of DTE in chloroform for 355 nm excitation wavelength.**

MCR-ALS resolution for the raw microsecond time-resolved spectra leads to the estimation of two components largely influence by the spectra of the closed form which is the major product and strongly overlap the other transient species spectra. In order to be able to estimate the spectra of the transients species without the influence of the closed form the data have been subtracted from the last spectra where only the closed form is still present taking the hypothesis that the concentration of the closed form is constant in the studied time domain (0.2-180  $\mu$ s). The corrected spectra are presented in Figure S.12.a). Two contributions are required in order to correctly reproduce the data. The constraints used are non-negativity both on concentration profiles and spectra and unimodality on the concentration. The MCR-ALS results are presented in Figure S.12 b) and c). The lack of fit is 5,31 % and no structure in the residuals are observed. The two contributions (called A and B) appear very quickly and decrease at different rate. Therefore the first contribution A which disappear quickly (red in Figure S.12.b) is attributed to  $^3P(T_1)$  and the second one B to  $^3AP(T_2)$ .

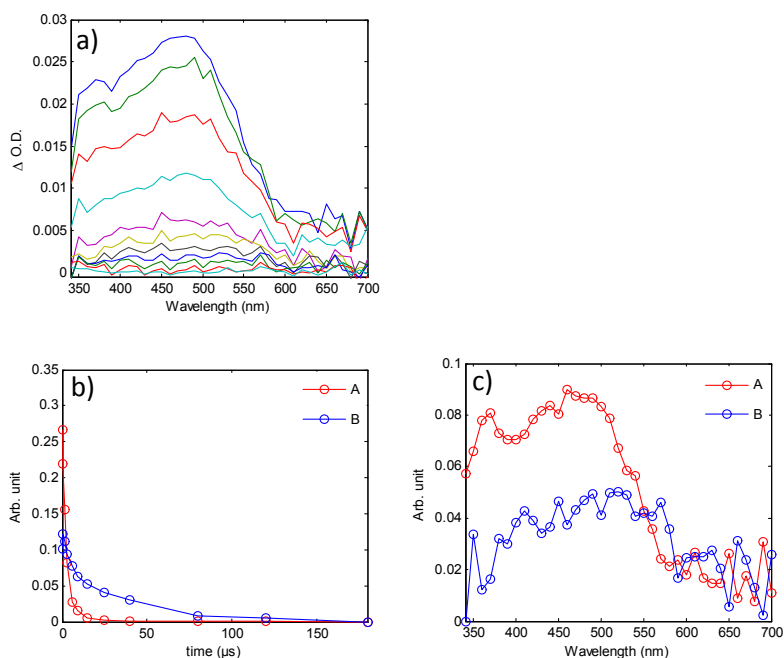

**Figure S.12.** (a) microsecond time-resolved spectra of DTE with the last spectrum (180  $\mu$ s) subtracted. Results obtained by MCR-ALS: (b) Concentration profiles and (c) spectra.

### Document S.13. MCR-ALS resolution of Subpicosecond time-resolved spectra of DTE in chloroform for 320 nm excitation wavelength.

Due to the strong overlapping of the different species and presence of parallel reactions, MCR-ALS has been realized separately first for the short time delay and in a second step on longer time delay. The constraints used are non-negativity both on concentration profiles and spectra and unimodality on the concentration. To avoid scale indeterminacies during ALS optimization each spectra has been normalized during the MCR-ALS decomposition.

First the 0 - 0.22ps time domain has been used to extract the spectra of  $S_1^{FC}(AP)$  and  $S_1^{FC}(P)$  (only transient species formed in this time domain). Concentration profile and spectra of this two contributions (called 1 and 2) obtained by MCR-ALS are presented in Figure S.14 a) and b) (l.o.f 4.51 %). These two contributions appear simultaneously with similar time profile.

In a second step spectra acquired in the 0.43 - 300 ps time domain has been used in order to extract the other transient species taking the hypothesis that both  $S_1^{FC}(AP)$  and  $S_1^{FC}(P)$  do not exist anymore in this time domain. Furthermore the known spectra of the closed form have been taken into account during the decomposition. Four contributions (called 3, 4, 5 and 6) are necessary to correctly reproduce the data. Concentration profiles and spectra of these three contributions are presented respectively in Figure S.14. c) and d). The lack of fit is equal to 5.11% and observation of the residuals does not show significant structure. The spectra of the extracted transient species with their assignments are presented Figure 7 in the manuscript.

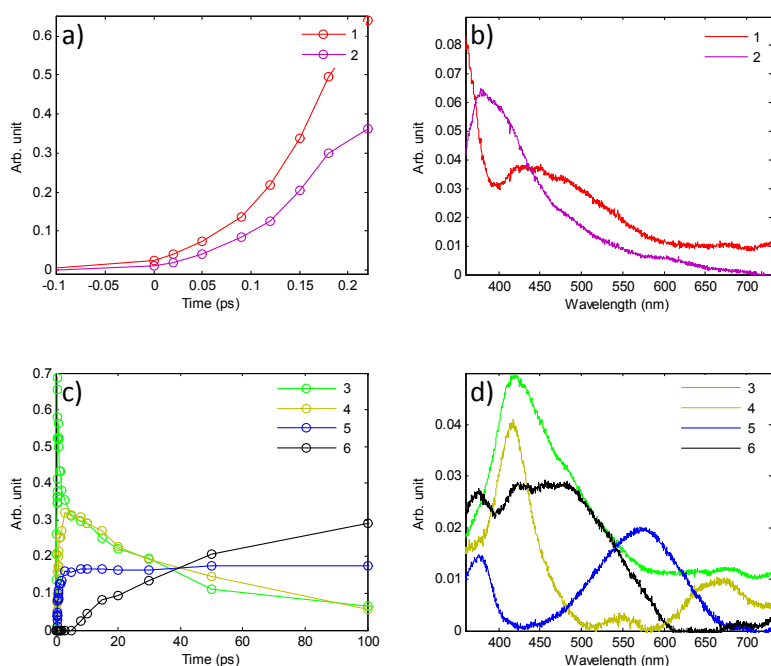

**Figure S.14.** MCR-ALS results for the transient absorption spectra of DTE in the 0 - 0.22 ps time domain: (a) concentration profiles and (b) spectra. MCR-ALS results for the transient absorption spectra of DTE in the 0.43 - 300 ps time domain: (c) concentration profiles and (d) spectra.

**Table S.15. DTE :** PCM(chloroform)-uCAM-B3LYP/6-311+G(2d,p) energies at the geometries optimized at the PCM(chloroform)- $\omega$ B97XD/6-31G(d) level.

| Geometry                              | $r_{cc}$ (Å) | $\phi_1$ (°) | $\phi_2$ (°) | Energy (a.u.)<br>( $S^2$ ) <sup>a</sup> | Relative energy<br>(eV) <sup>b</sup> |
|---------------------------------------|--------------|--------------|--------------|-----------------------------------------|--------------------------------------|
| AP                                    | 3.781        | -60.8        | -61.3        | -2513.56512509                          | 0.00                                 |
| <sup>3</sup> AP                       | 3.684        | -19.3        | -19.3        | -2513.47742114<br>(2.051)               | 2.39                                 |
| P                                     | 4.005        | 116.1        | -61.6        | -2513.56524036                          | 0.00                                 |
| <sup>3</sup> P                        | 3.927        | 116.1        | -63.4        | -2513.46624479<br>(2.003)               | 2.69                                 |
| <sup>1</sup> P                        | 3.979        | 147.9        | -23.5        | -2513.42699884                          | 3.76                                 |
| CF                                    | 1.538        | -12.2        | -3.3         | -2513.54030345                          | 0.68                                 |
| <sup>3</sup> CF                       | 1.565        | -7.5         | -18.0        | -2513.50804644<br>(2.062)               | 1.55                                 |
| <sup>1</sup> CF                       | 1.584        | -7.2         | -16.3        | -2513.46824374                          | 2.64                                 |
| TS(AP-CF)                             | 2.033        | -22.4        | -28.3        | -2513.47901804                          | 2.34                                 |
| TS( <sup>3</sup> AP- <sup>3</sup> CF) | 2.433        | -20.5        | -28.0        | -2513.46429757<br>(2.027)               | 2.74                                 |
| TS(AP-P)                              | 3.863        | 0.4          | -110.1       | -2513.53799229                          | 0.74                                 |

<sup>a</sup> The wavefunction spin-contamination  $S^2$  is reported in brackets.

<sup>b</sup> The reference energies are calculated with the open-ring AP minimum energy as reference.

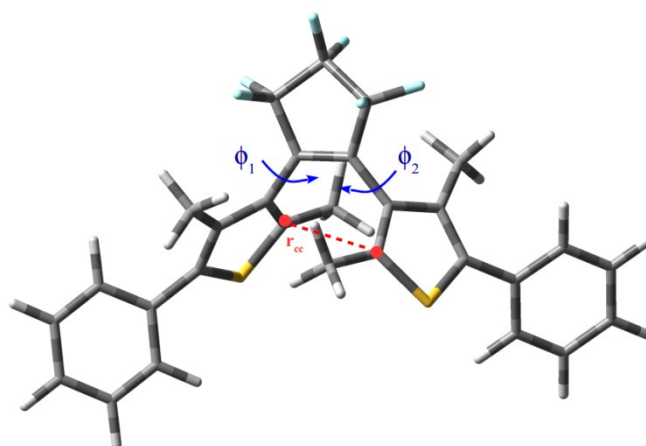

**Figure S.16:** Representation of the parameters  $r_{cc}$  (distance between the two reactive carbon atoms, involved in the bond formation/breaking) and the two dihedral angles  $\phi_1$  and  $\phi_2$ .

**Table S.17. DTE-m5:** PCM (chloroform)-uCAM-B3LYP/6-311+G(2d,p) energies at the geometries optimized at the PCM(chloroform)- $\omega$ B97XD/6-31G(d) level

| Geometry                              | $r_{cc}$ (Å) | $\phi_1$ (°) | $\phi_2$ (°) | Energy (a.u.) <sup>a</sup><br>( $S^2$ ) <sup>b</sup> | Relative energy<br>(eV) <sup>c</sup> |
|---------------------------------------|--------------|--------------|--------------|------------------------------------------------------|--------------------------------------|
| AP                                    | 3.887        | -60.9        | -63.8        | -2513.56337158                                       | 0.00                                 |
| <sup>3</sup> AP                       | 3.163        | -22.6        | -22.3        | -2513.47042571<br>(2.038)                            | 2.53                                 |
| P                                     | 3.958        | 114.8        | -62.1        | -2513.56019825                                       | 0.09                                 |
| <sup>3</sup> P                        | 4.319        | 154.8        | -21.8        | -2513.47176487<br>(2.051)                            | 2.49                                 |
| <sup>1</sup> P                        | 3.242        | 148.5        | -24.9        | -2513.52584534                                       | 1.02                                 |
| CF                                    | 1.538        | -5.0         | -10.5        | -2513.53889722                                       | 0.67                                 |
| <sup>3</sup> CF                       | 1.581        | -16.2        | -7.3         | -2513.50696551<br>(2.053)                            | 1.53                                 |
| <sup>1</sup> CF                       | 1.565        | -15.2        | -10.5        | -2513.52340861                                       | 1.09                                 |
| TS(AP-CF)                             | 1.920        | -10.6        | -30.3        | -2513.45934099                                       | 2.83                                 |
| TS( <sup>3</sup> AP- <sup>3</sup> CF) | 2.436        | -20.4        | -29.6        | -2513.46244375<br>(2.028)                            | 2.75                                 |
| TS(AP-P)                              | 4.085        | -5.1         | -106.2       | -2513.47426716                                       | 2.42                                 |

<sup>a</sup>The energies correspond to the energie of the DTE core structure : starting with the geometries of DTE-m5 optimized at the PCM(chloroform)- $\omega$ B97XD/6-31G(d) level, the methoxy chain has been replaced by H atoms and a single point calculation has been performed at the PCM(chloroform)-uCAM-B3LYP/6-311+G(2d,p) level.

<sup>b</sup>The wavefunction spin-contamination  $S^2$  is reported in brackets.

<sup>c</sup> The reference energies are calculated with the open-ring AP minimum energy as reference.

**Table S.18. Open-ring AP conformer of DTE and DTE-m5:** Computed absorption wavelengths ( $\lambda$  in nm), oscillator strengths  $f$  and electronic excitations. For each molecule, the transition with the highest oscillator strength value is highlighted. Only the first five electronic excitations are given.

| AP                    | DTE            |             |                                                                                                           | DTE-m5         |             |                                                                                                          |
|-----------------------|----------------|-------------|-----------------------------------------------------------------------------------------------------------|----------------|-------------|----------------------------------------------------------------------------------------------------------|
| State                 | $\lambda$ (nm) | $f$         | Description                                                                                               | $\lambda$ (nm) | $f$         | Description                                                                                              |
| $S_0 \rightarrow S_1$ | 296.0          | 0.08        | HOMO $\rightarrow$ LUMO                                                                                   | 295.0          | 0.11        | HOMO $\rightarrow$ LUMO                                                                                  |
| $S_0 \rightarrow S_2$ | 270.0          | 0.03        | HOMO-1 $\rightarrow$ LUMO                                                                                 | <b>272.1</b>   | <b>0.62</b> | <b>HOMO <math>\rightarrow</math> LUMO+1 (maj)</b><br><b>HOMO-1 <math>\rightarrow</math> LUMO+1 (min)</b> |
| $S_0 \rightarrow S_3$ | <b>266.5</b>   | <b>0.81</b> | <b>HOMO <math>\rightarrow</math> LUMO+1 (maj)</b><br><b>HOMO-1 <math>\rightarrow</math> LUMO+2 (min)</b>  | 267.7          | 0.03        | HOMO-1 $\rightarrow$ LUMO+1                                                                              |
| $S_0 \rightarrow S_4$ | 263.5          | 0.24        | HOMO $\rightarrow$ LUMO+2 (maj)<br>HOMO-1 $\rightarrow$ LUMO+1 (min)<br>HOMO-1 $\rightarrow$ LUMO+2 (min) | 252.0          | 0.41        | HOMO $\rightarrow$ LUMO+2 (maj)<br>HOMO-1 $\rightarrow$ LUMO+2 (min)                                     |
| $S_0 \rightarrow S_5$ | 250.7          | 0.16        | HOMO-2 $\rightarrow$ LUMO                                                                                 | 248.9          | 0.03        | HOMO $\rightarrow$ LUMO+3 (maj)<br>HOMO-1 $\rightarrow$ LUMO+3 (min)                                     |

**Figure S19. Open-ring AP conformer of DTE and DTE-m5:** Representation of the frontier orbital contour plot (isovalue : 0.02 a.u.) computed at the PCM(chloroform)-uCAM-B3LYP/6-311+G(2d,p) level.

|        | DTE                                                                                 | DTE-m5                                                                                |
|--------|-------------------------------------------------------------------------------------|---------------------------------------------------------------------------------------|
| LUMO+2 | 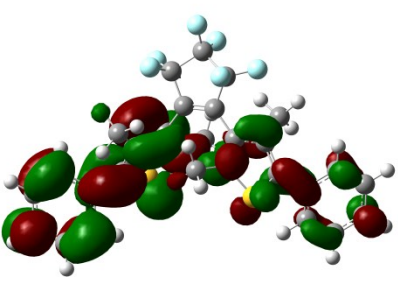   |    |
| LUMO+1 |   |   |
| LUMO   |  |  |
| HOMO   |  |  |



HOMO-1

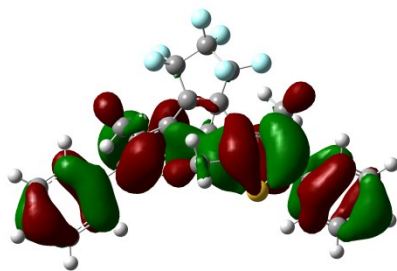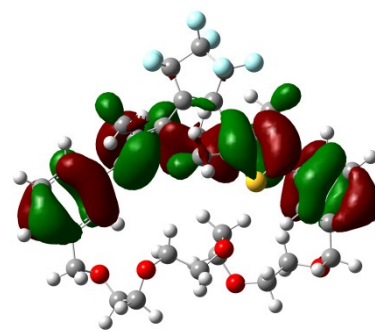

**Table S.20. Open-ring P conformer of DTE and DTE-m5:** Computed absorption wavelengths ( $\lambda$  in nm), oscillator strengths  $f$  and electronic excitations. For each molecule, the transition with the highest oscillator strength value is highlighted.

| P | DTE                   |                |             | DTE-m5                                                                                                                                                          |                |             |                                               |
|---|-----------------------|----------------|-------------|-----------------------------------------------------------------------------------------------------------------------------------------------------------------|----------------|-------------|-----------------------------------------------|
|   | State                 | $\lambda$ (nm) | $f$         | Description                                                                                                                                                     | $\lambda$ (nm) | $f$         | Description                                   |
|   | $S_0 \rightarrow S_1$ | 285.6          | 0.02        | HOMO $\rightarrow$ LUMO                                                                                                                                         | 289.0          | 0.06        | HOMO $\rightarrow$ LUMO                       |
|   | $S_0 \rightarrow S_2$ | 284.7          | 0.13        | HOMO-1 $\rightarrow$ LUMO                                                                                                                                       | 286.2          | 0.13        | HOMO-1 $\rightarrow$ LUMO                     |
|   | $S_0 \rightarrow S_3$ | 267.0          | 0.34        | HOMO $\rightarrow$ LUMO+1 (maj)<br>HOMO-1 $\rightarrow$ LUMO+2 (min)                                                                                            | 277.3          | 0.36        | HOMO $\rightarrow$ LUMO+1                     |
|   | $S_0 \rightarrow S_4$ | <b>262.4</b>   | <b>0.65</b> | <b>HOMO <math>\rightarrow</math> LUMO+2 (maj)</b><br><b>HOMO-1 <math>\rightarrow</math> LUMO+1 (min)</b><br><b>HOMO-1 <math>\rightarrow</math> LUMO+2 (min)</b> | <b>263.0</b>   | <b>0.51</b> | <b>HOMO-1 <math>\rightarrow</math> LUMO+2</b> |
|   | $S_0 \rightarrow S_5$ | 250.7          | 0.10        | HOMO-2 $\rightarrow$ LUMO                                                                                                                                       | 252.7          | 0.03        | HOMO $\rightarrow$ LUMO+3                     |

**Figure S21. Open-ring P conformer of DTE and DTE-m5:** Representation of the frontier orbital contour plot (isovalue : 0.02 a.u.) computed at the PCM(chloroform)-uCAM-B3LYP/6-311+G(2d,p) level.

|        | DTE                                                                                 | DTE-m5                                                                                |
|--------|-------------------------------------------------------------------------------------|---------------------------------------------------------------------------------------|
| LUMO+2 | 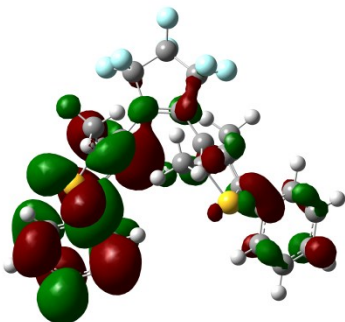   |    |
| LUMO+1 |   |   |
| LUMO   |  |  |
| HOMO   |  |  |

HOMO-1

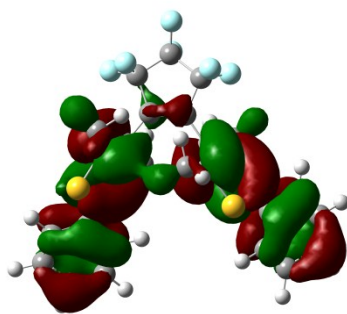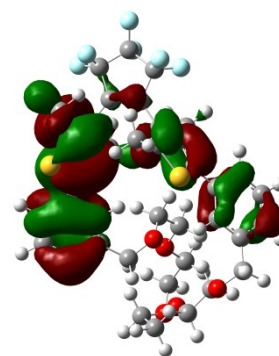

**Table S.22. Closed-Form CF conformer of DTE and DTE-m5 :** Computed absorption wavelengths ( $\lambda$  in nm), oscillator strengths  $f$  and electronic excitations. For each molecule, the transition with the highest oscillator strength value is highlighted.

| P                     | DTE            |             |                                                                    | DTE-m5         |             |                                                                    |
|-----------------------|----------------|-------------|--------------------------------------------------------------------|----------------|-------------|--------------------------------------------------------------------|
|                       | $\lambda$ (nm) | $f$         | Description                                                        | $\lambda$ (nm) | $f$         | Description                                                        |
| $S_0 \rightarrow S_1$ | <b>525.4</b>   | <b>0.33</b> | <b>HOMO <math>\rightarrow</math> LUMO</b>                          | <b>512.8</b>   | <b>0.30</b> | <b>HOMO <math>\rightarrow</math> LUMO</b>                          |
| $S_0 \rightarrow S_2$ | 348.1          | 0.24        | HOMO-1 $\rightarrow$ LUMO                                          | 345.7          | 0.23        | HOMO-1 $\rightarrow$ LUMO                                          |
| $S_0 \rightarrow S_3$ | 299.5          | 0.10        | HOMO $\rightarrow$ LUMO+1 (maj)<br>HOMO $\rightarrow$ LUMO+2 (min) | 296.7          | 0.07        | HOMO $\rightarrow$ LUMO+1 (maj)<br>HOMO $\rightarrow$ LUMO+2 (min) |
| $S_0 \rightarrow S_4$ | 290            | 0.12        | HOMO $\rightarrow$ LUMO+1 (min)<br>HOMO $\rightarrow$ LUMO+2 (maj) | 284.3          | 0.15        | HOMO $\rightarrow$ LUMO+1 (min)<br>HOMO $\rightarrow$ LUMO+2 (maj) |
| $S_0 \rightarrow S_5$ | 268            | 0.16        | HOMO $\rightarrow$ LUMO+3                                          | 267.7          | 0.15        | HOMO-2 $\rightarrow$ LUMO                                          |

**Figure S.23. Closed Form CF conformer of DTE and DTE-m5:** Representation of the frontier orbital contour plot (isovalue : 0.02 a.u.) computed at the PCM(chloroform)-uCAM-B3LYP/6-311+G(2d,p) level.

|        | DTE                                                                                  | DTE-m5                                                                                |
|--------|--------------------------------------------------------------------------------------|---------------------------------------------------------------------------------------|
| LUMO+2 | 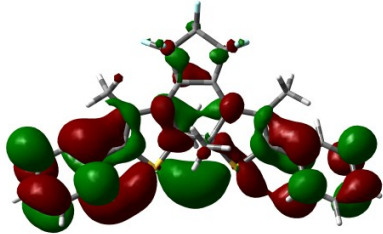   |    |
| LUMO+1 |    |    |
| LUMO   |  |  |
| HOMO   |  |  |
| HOMO-1 |  |  |

**Figure S.24. Open Form <sup>3</sup>AP conformer of DTE and DTE-m5:** Top: Representation of the SOMOs (Singly Occupied Molecular Orbitals) contour plot (isovalue : 0.02 a.u.) computed at the PCM(chloroform)-uCAM-B3LYP/6-311+G(2d,p) level. Bottom : Orbitals Spin Density : Blue (green) surfaces indicate excess of alpha (beta) over beta (alpha) spin electrons.

|                       | DTE                                                                                  | DTE-m5                                                                                |
|-----------------------|--------------------------------------------------------------------------------------|---------------------------------------------------------------------------------------|
| SOMO (highest energy) | 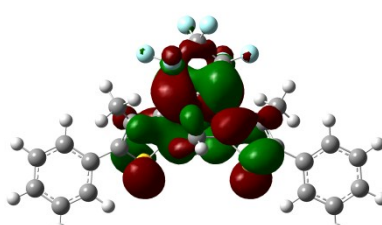   |    |
| SOMO (lowest energy)  |  |   |
| Spin Density          |  |  |

## S.25. GEOMETRIES : DTE

|               |             |             |                                             |
|---------------|-------------|-------------|---------------------------------------------|
| <b>AP</b>     |             |             | <b><sup>3</sup>AP</b>                       |
| C 2.66338800  | 0.02019300  | 0.07294400  | C 2.933847 0.048843 -0.099224               |
| C 1.42295900  | 0.38781900  | 0.71126000  | C 1.593477 0.335462 0.411848                |
| C 1.00066500  | -0.50417200 | 1.66310200  | C 1.198167 -0.591107 1.398893               |
| S 2.11232000  | -1.81455500 | 1.79425400  | S 2.421822 -1.767514 1.672851               |
| C 3.14666700  | -1.16956000 | 0.55312400  | C 3.483104 -1.056404 0.478672               |
| C 0.62754800  | 1.56974300  | 0.34295700  | C 0.740648 1.350958 -0.065617               |
| C -0.61124800 | 1.58175800  | -0.18481900 | C -0.740571 1.350921 0.065846               |
| C -1.08434700 | 2.99737200  | -0.41619700 | C -1.125267 2.705126 0.553904               |
| C 0.20519500  | 3.84034500  | -0.29117400 | C -0.000294 3.649489 -0.000358              |
| C 1.09527300  | 2.97645700  | 0.62185300  | C 1.125416 2.705244 -0.553475               |
| C -1.41592400 | 0.41361700  | -0.58343300 | C -1.593461 0.335525 -0.411757              |
| C -0.99175000 | -0.46166100 | -1.55036100 | C -1.198306 -0.590722 -1.399146             |
| S -2.12752200 | -1.74417300 | -1.74326300 | S -2.422086 -1.766917 -1.673406             |
| C -3.18031900 | -1.10686000 | -0.51463900 | C -3.483158 -1.056219 -0.478813             |
| C -2.68149300 | 0.05662900  | 0.01083900  | C -2.933708 0.04875 0.099475                |
| C 0.24971300  | -0.41079100 | -2.38528800 | C 0.02036 -0.592386 -2.273392               |
| F 0.86545900  | 3.30549900  | 1.92155600  | F 2.330733 3.141637 -0.124943               |
| F 2.40617600  | 3.19130400  | 0.38764500  | F 1.12919 2.806893 -1.92286                 |
| F -0.01346700 | 5.07195900  | 0.18935100  | F 0.49399 4.437795 0.970259                 |
| F 0.79145300  | 3.94016400  | -1.50364200 | F -0.495276 4.435947 -0.97214               |
| F -1.66346500 | 3.14903600  | -1.62566600 | F -2.331078 3.141256 0.126561               |
| F -1.97703000 | 3.42399200  | 0.51526400  | F -1.127641 2.806843 1.923315               |
| C -0.22988600 | -0.44950100 | 2.51406800  | C -0.020539 -0.593027 2.273086              |
| H -0.06689500 | -0.92484500 | 3.48499400  | H 0.177889 -1.122347 3.20917                |
| H -0.51569400 | 0.59101700  | 2.69132000  | H -0.318481 0.428125 2.520674               |
| H -1.07076300 | -0.95449400 | 2.02482500  | H -0.869535 -1.084129 1.785105              |
| H 1.07267900  | -0.95127800 | -1.90422200 | H 0.869541 -1.083102 -1.785343              |
| H 0.08507000  | -0.85223000 | -3.37186100 | H -0.177904 -1.121912 -3.209387             |
| H 0.56464700  | 0.62654700  | -2.52789500 | H 0.317948 0.428843 -2.521107               |
| C 4.34780100  | -1.91763800 | 0.13837600  | C 4.785047 -1.692514 0.20681                |
| C 4.28415000  | -3.29864700 | -0.09079900 | C 4.886229 -3.078938 0.033847               |
| C 5.57483600  | -1.26479100 | -0.03313400 | C 5.948825 -0.916565 0.133984               |
| C 5.41517900  | -4.00541900 | -0.48406800 | C 6.119362 -3.672184 -0.21306               |
| H 3.33690000  | -3.81808000 | 0.02541600  | H 3.990977 -3.693233 0.078707               |
| C 6.70338200  | -1.97185200 | -0.43562900 | C 7.180484 -1.511413 -0.118252              |
| H 5.64788900  | -0.20048500 | 0.16686400  | H 5.885593 0.155441 0.293199                |
| C 6.62801800  | -3.34402100 | -0.66165500 | C 7.269774 -2.890365 -0.291883              |
| H 5.34535900  | -5.07461600 | -0.65988700 | H 6.181361 -4.747437 -0.349878              |
| H 7.64695300  | -1.44997100 | -0.56332900 | H 8.073751 -0.896313 -0.169409              |
| H 7.51039900  | -3.89507300 | -0.97240700 | H 8.232037 -3.354786 -0.484214              |
| C -4.41851700 | -1.82886100 | -0.16767200 | C -4.785035 -1.692424 -0.206873             |
| C -4.40302300 | -3.21485200 | 0.03766600  | C -4.88619 -3.078926 -0.034448              |
| C -5.63480600 | -1.14535500 | -0.04520600 | C -5.948796 -0.916511 -0.133448             |
| C -5.57076000 | -3.89708600 | 0.36091300  | C -6.11926 -3.672255 0.212549               |
| H -3.46517700 | -3.75766700 | -0.04281500 | H -3.990957 -3.693213 -0.079761             |
| C -6.80034800 | -1.82807600 | 0.28799200  | C -7.180401 -1.51145 0.118848               |
| H -5.66816300 | -0.07586800 | -0.22911500 | H -5.885605 0.155559 -0.292242              |
| C -6.77284400 | -3.20565600 | 0.49107200  | C -7.269656 -2.890465 0.291963              |
| H -5.53875000 | -4.97085700 | 0.51916800  | H -6.181226 -4.747557 0.348992              |
| H -7.73503300 | -1.28300500 | 0.37888000  | H -8.07365 -0.896361 0.17045                |
| H -7.68419500 | -3.73768000 | 0.74645600  | H -8.231872 -3.35496 0.484353               |
| C -3.33543900 | 0.83575900  | 1.11796900  | C -3.571727 0.774977 1.25111                |
| H -2.58746200 | 1.26256200  | 1.79120600  | H -2.81807 1.081394 1.980686                |
| H -3.92922000 | 1.66874300  | 0.72809700  | H -4.095153 1.67875 0.928087                |
| H -3.99851600 | 0.19582200  | 1.70536800  | H -4.293496 0.129684 1.757462               |
| C 3.30083700  | 0.80546200  | -1.04121200 | C 3.572202 0.775685 -1.250279               |
| H 2.55743000  | 1.40002800  | -1.57878000 | H 2.818804 1.081979 -1.980178               |
| H 4.05490100  | 1.50331900  | -0.66528300 | H 4.094995 1.679607 -0.926668               |
| H 3.78930500  | 0.13803200  | -1.75654100 | H 4.294588 0.130896 -1.756383               |
| <b>P</b>      |             |             | <b><sup>3</sup>P</b>                        |
| C -1.45628000 | -1.67234800 | -0.10585800 | C -1.3173385283 -1.4765675658 -0.0366501005 |
| C -0.25283200 | -1.45912200 | 0.66073800  | C -0.1092883986 -1.3161715453 0.7336465615  |
| C -0.47773800 | -1.04577200 | 1.94864400  | C -0.2830364631 -0.6397790785 1.9123364941  |
| S -2.17028800 | -0.90431600 | 2.24701700  | S -1.9306057049 -0.1704699415 2.098008224   |
| C -2.57953200 | -1.39111600 | 0.62736800  | C -2.3872437916 -0.8741620723 0.5735079656  |



|               |             |             |                 |               |               |
|---------------|-------------|-------------|-----------------|---------------|---------------|
| C 1.10327400  | -1.59826000 | 0.10868000  | C 1.2234079018  | -1.6699981886 | 0.2183937094  |
| C 2.01593100  | -0.62119000 | -0.03997200 | C 2.171359405   | -0.7886506106 | -0.1455641157 |
| C 3.28762000  | -1.15490800 | -0.65129300 | C 3.3870768617  | -1.4837089521 | -0.6983609521 |
| C 2.88800800  | -2.55391900 | -1.17411800 | C 2.9095841248  | -2.9422764362 | -0.9137101973 |
| C 1.68949000  | -2.93187200 | -0.28177300 | C 1.7259869454  | -3.0818719946 | 0.0685074146  |
| C 1.83788200  | 0.81135800  | 0.25782300  | C 2.0117977072  | 0.6773611718  | -0.0960953696 |
| C 2.54565900  | 1.47842300  | 1.22395800  | C 2.7824845441  | 1.5141428207  | 0.7369426575  |
| S 2.03763600  | 3.12630400  | 1.31005500  | S 2.361347568   | 3.2262136151  | 0.4946931629  |
| C 0.88060000  | 2.92318000  | 0.02703300  | C 0.8884535396  | 2.7410890343  | -0.383794398  |
| C 0.88642200  | 1.63719900  | -0.44353300 | C 1.0518702125  | 1.3278386352  | -0.8466282379 |
| C 3.60938400  | 0.96494000  | 2.14707500  | C 3.794513612   | 1.1479799811  | 1.7646240448  |
| F 2.13588000  | -3.59391500 | 0.81942900  | F 2.1784259012  | -3.555944748  | 1.2592857833  |
| F 0.83554500  | -3.75846500 | -0.91914300 | F 0.8033232199  | -3.955203672  | -0.3830175054 |
| F 3.88941200  | -3.44300200 | -1.12360100 | F 3.8766326698  | -3.8458307468 | -0.7081513856 |
| F 2.46211300  | -2.44447000 | -2.45089600 | F 2.4453203636  | -3.0742491359 | -2.1744251971 |
| F 3.74293600  | -0.36502100 | -1.64646500 | F 3.8017081024  | -0.923580044  | -1.8548807106 |
| F 4.29499100  | -1.28770800 | 0.25130700  | F 4.4444267427  | -1.4791946145 | 0.1540403365  |
| C 0.51965000  | -0.74201200 | 3.02274300  | C 0.7445220695  | -0.268929705  | 2.9352496201  |
| H 0.15790000  | -1.06260400 | 4.00375200  | H 0.376298896   | -0.4328646185 | 3.9521707192  |
| H 1.45846400  | -1.26445900 | 2.82147100  | H 1.6452946347  | -0.8732956064 | 2.8004098099  |
| H 0.73190700  | 0.33181900  | 3.07233500  | H 1.0244623929  | 0.7865644476  | 2.8428582562  |
| H 4.60899200  | 1.15288800  | 1.74158100  | H 4.7831950782  | 1.552343923   | 1.5117767593  |
| H 3.54619800  | 1.44455300  | 3.12778700  | H 3.520520307   | 1.5543159096  | 2.7463183543  |
| H 3.50833700  | -0.11293900 | 2.28803500  | H 3.8874522689  | 0.0646067555  | 1.8552035462  |
| C -3.99385200 | -1.44434700 | 0.21410200  | C -3.7680272623 | -0.719393085  | 0.0824637252  |
| C -4.87670000 | -0.40758700 | 0.54470900  | C -4.4212647796 | 0.5162751927  | 0.1928868969  |
| C -4.48414700 | -2.53922100 | -0.50867400 | C -4.4501207337 | -1.7883014332 | -0.5113866051 |
| C -6.21227600 | -0.46457500 | 0.16153700  | C -5.7156948565 | 0.6802243493  | -0.2871290337 |
| H -4.50969800 | 0.45549500  | 1.09354100  | H -3.901055157  | 1.3581685693  | 0.642173185   |
| C -5.81814300 | -2.58988800 | -0.89979500 | C -5.7422944546 | -1.6196205427 | -0.9993192801 |
| H -3.81910600 | -3.36270200 | -0.74865500 | H -3.9709909474 | -2.7601072252 | -0.5765485245 |
| C -6.68696900 | -1.55450400 | -0.56443200 | C -6.379334852  | -0.3860201992 | -0.8902501314 |
| H -6.88254400 | 0.34765700  | 0.42620800  | H -6.2038357337 | 1.6461333217  | -0.195795061  |
| H -6.18144100 | -3.44750600 | -1.45790100 | H -6.2585388837 | -2.45855091   | -1.4592410651 |
| H -7.72943900 | -1.59814700 | -0.86474000 | H -7.3880239742 | -0.2577574757 | -1.2708445493 |
| C 0.04931800  | 4.06147800  | -0.40514700 | C -0.2966891165 | 3.500465726   | -0.3448137332 |
| C 0.61118000  | 5.32752700  | -0.61396600 | C -0.2860375506 | 4.8646448253  | 0.0735469777  |
| C -1.32762500 | 3.89536600  | -0.60288300 | C -1.5598158625 | 2.9484887626  | -0.7179295028 |
| C -0.18204000 | 6.39700100  | -1.01575800 | C -1.4437488242 | 5.618969934   | 0.0880979803  |
| H 1.67911900  | 5.47072600  | -0.47438100 | H 0.6509871737  | 5.3243160115  | 0.3740974795  |
| C -2.11745100 | 4.96357900  | -1.01542000 | C -2.7078836557 | 3.7184910814  | -0.6979219083 |
| H -1.78200600 | 2.92725200  | -0.41503000 | H -1.63407553   | 1.9029853754  | -0.9890685054 |
| C -1.54781200 | 6.21759600  | -1.22215600 | C -2.665031918  | 5.0597932018  | -0.3038694021 |
| H 0.27065200  | 7.37089400  | -1.17556100 | H -1.4007178824 | 6.6571699804  | 0.4035555107  |
| H -3.18271000 | 4.81667900  | -1.16581200 | H -3.6529645764 | 3.2663237616  | -0.9860304099 |
| H -2.16589900 | 7.05172000  | -1.54022700 | H -3.5697763681 | 5.6591351652  | -0.2958545319 |
| C 0.05945400  | 1.14285200  | -1.59569100 | C 0.3820472398  | 0.7721179097  | -2.0630207012 |
| H 0.62370700  | 0.41677600  | -2.18950400 | H 0.969898001   | -0.0485611095 | -2.4842677935 |
| H -0.85578700 | 0.64967000  | -1.25073900 | H -0.6224327091 | 0.3843447454  | -1.8590930641 |
| H -0.23196200 | 1.96672200  | -2.25189000 | H 0.2789087922  | 1.5496985096  | -2.8269143816 |
| C -1.46553800 | -2.07299000 | -1.55674400 | C -1.3625887759 | -2.1630837708 | -1.3747805052 |
| H -0.54379000 | -1.76189000 | -2.05577500 | H -0.394751095  | -2.1050743917 | -1.8802228808 |
| H -1.54600800 | -3.15730500 | -1.67714000 | H -1.6070711716 | -3.2249068789 | -1.2708338266 |
| H -2.30998700 | -1.61508300 | -2.07937700 | H -2.1156477188 | -1.7095834185 | -2.0255036082 |
| <b>1P</b>     |             |             |                 |               |               |
| C -0.22024700 | 0.55671200  | -0.34556400 |                 |               |               |
| C -0.60165700 | -0.16811800 | 0.85869700  |                 |               |               |
| C -0.02167400 | -1.47072500 | 0.89320500  |                 |               |               |
| S 0.82873700  | -1.81287200 | -0.55261500 |                 |               |               |
| C 0.52199100  | -0.20722500 | -1.20006800 |                 |               |               |
| C -1.55931800 | 0.25584600  | 1.81383900  |                 |               |               |
| C -2.39257700 | -0.63817100 | 2.57378500  |                 |               |               |
| C -2.62637800 | -0.06670400 | 3.91941600  |                 |               |               |
| C -2.23840700 | 1.44159700  | 3.78465400  |                 |               |               |
| C -1.81153300 | 1.63493000  | 2.29738100  |                 |               |               |
| C -2.90255800 | -1.85651200 | 2.05323400  |                 |               |               |
| C -3.14541700 | -3.03083500 | 2.80208400  |                 |               |               |
| S -3.43482300 | -4.35556600 | 1.77650400  |                 |               |               |
| C -3.35268600 | -3.39388900 | 0.32438700  |                 |               |               |
| C -3.10550100 | -2.08320100 | 0.61616100  |                 |               |               |

|                       |             |             |             |  |
|-----------------------|-------------|-------------|-------------|--|
| C                     | -2.99933200 | -3.25298100 | 4.27051800  |  |
| F                     | -0.75246400 | 2.47803900  | 2.21944200  |  |
| F                     | -2.85175300 | 2.26495600  | 1.64606200  |  |
| F                     | -1.19666700 | 1.74099600  | 4.58651900  |  |
| F                     | -3.26750600 | 2.23847000  | 4.12667800  |  |
| F                     | -3.90673000 | -0.18972200 | 4.36595400  |  |
| F                     | -1.84197200 | -0.61749800 | 4.91251800  |  |
| C                     | 0.14074100  | -2.40506000 | 2.04954500  |  |
| H                     | 1.20574900  | -2.58209200 | 2.24126800  |  |
| H                     | -0.29616000 | -1.98383500 | 2.95520300  |  |
| H                     | -0.32065800 | -3.38230900 | 1.85485500  |  |
| H                     | -3.65511700 | -2.58765300 | 4.83823600  |  |
| H                     | -3.24084900 | -4.28452400 | 4.53837000  |  |
| H                     | -1.97205400 | -3.04626900 | 4.59266700  |  |
| C                     | 1.03009300  | 0.11628000  | -2.54062500 |  |
| C                     | 0.91330400  | -0.80514700 | -3.59095800 |  |
| C                     | 1.65973400  | 1.34440600  | -2.78597000 |  |
| C                     | 1.40327400  | -0.50121600 | -4.85545100 |  |
| H                     | 0.42219400  | -1.75913300 | -3.41885800 |  |
| C                     | 2.14533600  | 1.64680700  | -4.05325100 |  |
| H                     | 1.78466900  | 2.05383200  | -1.97400900 |  |
| C                     | 2.01835700  | 0.72647100  | -5.09104000 |  |
| H                     | 1.30127400  | -1.22394200 | -5.65904500 |  |
| H                     | 2.63299200  | 2.60102000  | -4.22678200 |  |
| H                     | 2.40228100  | 0.96241800  | -6.07870500 |  |
| C                     | -3.57914200 | -4.01780200 | -0.98884100 |  |
| C                     | -4.59557600 | -4.96147200 | -1.18617900 |  |
| C                     | -2.75544100 | -3.67835500 | -2.07077500 |  |
| C                     | -4.78484500 | -5.54568200 | -2.43397500 |  |
| H                     | -5.25178600 | -5.22851500 | -0.36215900 |  |
| C                     | -2.95359300 | -4.25570700 | -3.31981600 |  |
| H                     | -1.94500100 | -2.97069100 | -1.92201800 |  |
| C                     | -3.96753800 | -5.19279300 | -3.50549400 |  |
| H                     | -5.57795700 | -6.27451000 | -2.57057900 |  |
| H                     | -2.30618400 | -3.98046300 | -4.14710100 |  |
| H                     | -4.11837200 | -5.64837100 | -4.47932100 |  |
| C                     | -3.27844100 | -0.98129100 | -0.39750200 |  |
| H                     | -3.58467700 | -0.05601000 | 0.09656300  |  |
| H                     | -2.36604300 | -0.76731300 | -0.96110200 |  |
| H                     | -4.05027600 | -1.26313900 | -1.11921800 |  |
| C                     | -0.74963000 | 1.91655400  | -0.69932600 |  |
| H                     | -1.79854800 | 2.00412700  | -0.40622800 |  |
| H                     | -0.20251100 | 2.71202500  | -0.18551900 |  |
| H                     | -0.67842600 | 2.09364100  | -1.77444500 |  |
| <b>CF</b>             |             |             |             |  |
| C                     | -1.24609500 | 2.97854000  | -0.15009600 |  |
| C                     | -0.73077900 | 1.56957500  | -0.10699300 |  |
| C                     | 0.73783600  | 1.58939900  | -0.05734000 |  |
| C                     | 1.20863400  | 3.00362400  | -0.21351900 |  |
| C                     | -0.01832900 | 3.84834000  | 0.20706600  |  |
| C                     | 1.45925700  | 0.45833300  | 0.14646500  |  |
| C                     | 0.64911100  | -0.75574800 | 0.61057000  |  |
| C                     | -0.60201800 | -0.87240900 | -0.27513800 |  |
| C                     | -1.42807500 | 0.41072000  | -0.17429900 |  |
| S                     | 1.78117800  | -2.19818700 | 0.45490700  |  |
| C                     | 3.15878200  | -1.14662100 | 0.14625900  |  |
| C                     | 2.87572100  | 0.17826200  | 0.01107000  |  |
| C                     | -2.85630200 | 0.13973500  | -0.24854500 |  |
| C                     | -3.14261500 | -1.17058600 | -0.02191800 |  |
| S                     | -1.74523600 | -2.20999900 | 0.26765700  |  |
| C                     | 0.34211100  | -0.56485300 | 2.11257100  |  |
| C                     | -0.27895500 | -1.08581500 | -1.77174000 |  |
| F                     | 2.26807700  | 3.33847300  | 0.55802300  |  |
| F                     | 1.53251100  | 3.32163600  | -1.50070100 |  |
| F                     | 0.01871700  | 4.01712700  | 1.54617500  |  |
| F                     | -0.04637400 | 5.05375700  | -0.37957600 |  |
| F                     | -1.67399300 | 3.33955100  | -1.39403900 |  |
| F                     | -2.26004400 | 3.23587700  | 0.70957900  |  |
| H                     | 0.33123800  | -0.26089800 | -2.15177500 |  |
| H                     | 0.25694500  | -2.02337300 | -1.92922400 |  |
| <b><sup>3</sup>CF</b> |             |             |             |  |
| C                     | -1.235093   | 3.015623    | -0.225412   |  |
| C                     | -0.675037   | 1.622014    | -0.226809   |  |
| C                     | 0.688987    | 1.651949    | -0.052119   |  |
| C                     | 1.201302    | 3.057555    | -0.079138   |  |
| C                     | -0.049792   | 3.909246    | 0.216996    |  |
| C                     | 1.45904     | 0.452826    | 0.200129    |  |
| C                     | 0.618233    | -0.713567   | 0.676208    |  |
| C                     | -0.54862    | -0.86265    | -0.356708   |  |
| C                     | -1.409896   | 0.386758    | -0.3033     |  |
| S                     | 1.764315    | -2.147091   | 0.692827    |  |
| C                     | 3.133002    | -1.175696   | 0.198196    |  |
| C                     | 2.796395    | 0.175007    | -0.035719   |  |
| C                     | -2.786875   | 0.13547     | -0.320128   |  |
| C                     | -3.097135   | -1.2189     | -0.129577   |  |
| S                     | -1.689451   | -2.244398   | 0.04318     |  |
| C                     | 0.104829    | -0.496014   | 2.110722    |  |
| C                     | -0.035814   | -1.071373   | -1.795649   |  |
| F                     | 2.180794    | 3.302304    | 0.819986    |  |
| F                     | 1.68623     | 3.417328    | -1.304924   |  |
| F                     | -0.126414   | 4.128827    | 1.545141    |  |
| F                     | -0.038015   | 5.094724    | -0.411972   |  |
| F                     | -1.673287   | 3.414253    | -1.44998    |  |
| F                     | -2.266385   | 3.181197    | 0.638861    |  |
| H                     | 0.588095    | -0.22963    | -2.108994   |  |
| H                     | 0.552302    | -1.990178   | -1.868419   |  |

|                                       |                                 |
|---------------------------------------|---------------------------------|
| H -1.21338500 -1.11462200 -2.33785200 | H -0.886351 -1.143364 -2.478174 |
| H -0.28385400 0.31816400 2.26750000   | H -0.576967 0.358289 2.150314   |
| H -0.16947500 -1.43567900 2.52675900  | H -0.429228 -1.378028 2.473183  |
| H 1.28275800 -0.42264700 2.65051400   | H 0.94893 -0.298377 2.776084    |
| C 3.89151000 1.20101400 -0.41686700   | C 3.788893 1.163746 -0.585901   |
| H 3.47581000 1.84620000 -1.19509300   | H 3.305598 1.852101 -1.279614   |
| H 4.20202300 1.84430600 0.41065600    | H 4.239491 1.762813 0.211509    |
| H 4.78043800 0.71472800 -0.82287500   | H 4.592627 0.652533 -1.119493   |
| C -3.89014700 1.17643800 -0.59215800  | C -3.857691 1.162781 -0.580508  |
| H -4.17127300 1.77701200 0.27779700   | H -4.17315 1.668533 0.335979    |
| H -3.50791200 1.86182000 -1.35126200  | H -3.502273 1.925153 -1.274111  |
| H -4.79358900 0.70275000 -0.98230600  | H -4.736226 0.687469 -1.022298  |
| C -4.47494300 -1.80418200 0.01616300  | C -4.42214 -1.841721 -0.034035  |
| C -4.70930200 -3.01480400 -0.64907000 | C -4.668655 -3.087437 -0.633176 |
| C -5.51975800 -1.21482200 0.73896600  | C -5.458261 -1.23137 0.69033    |
| C -5.96523500 -3.60941200 -0.60794700 | C -5.914816 -3.69281 -0.52439   |
| H -3.90590900 -3.48368600 -1.20958400 | H -3.881162 -3.574042 -1.201326 |
| C -6.77403600 -1.81398200 0.78118700  | C -6.703776 -1.83903 0.795387   |
| H -5.34158700 -0.29306100 1.28352900  | H -5.278112 -0.288953 1.196359  |
| C -7.00084800 -3.01080400 0.10632600  | C -6.937909 -3.070261 0.187177  |
| H -6.13446200 -4.54385400 -1.13396400 | H -6.087555 -4.652896 -1.000879 |
| H -7.57374900 -1.34717300 1.34781400  | H -7.491006 -1.352901 1.363465  |
| H -7.97966200 -3.47904500 0.14143200  | H -7.910507 -3.544827 0.272787  |
| C 4.48183100 -1.79051900 0.03642900   | C 4.438819 -1.818948 0.057067   |
| C 4.64929600 -2.94002700 -0.74619100  | C 4.545753 -3.110603 -0.486057  |
| C 5.58436200 -1.27294000 0.72749200   | C 5.612641 -1.177589 0.487132   |
| C 5.89660600 -3.54490900 -0.85113900  | C 5.783722 -3.727922 -0.613268  |
| H 3.80218500 -3.35092300 -1.28812700  | H 3.651626 -3.622525 -0.830917  |
| C 6.83012400 -1.88215400 0.62315600   | C 6.848968 -1.79841 0.356829    |
| H 5.45795400 -0.39884900 1.35881100   | H 5.549915 -0.198711 0.950831   |
| C 6.98999900 -3.01703000 -0.16823200  | C 6.941355 -3.073803 -0.196299  |
| H 6.01451000 -4.42991600 -1.46857000  | H 5.845616 -4.721543 -1.046499  |
| H 7.67624900 -1.47116800 1.16495200   | H 7.743358 -1.287272 0.699869   |
| H 7.96315800 -3.49108200 -0.25046400  | H 7.908264 -3.55674 -0.297662   |
| <b><sup>1</sup>CF(relax)</b>          |                                 |
| C -1.23017 3.028411 -0.144245         |                                 |
| C -0.683647 1.636091 -0.18121         |                                 |
| C 0.711057 1.658654 0.003094          |                                 |
| C 1.215551 3.061311 -0.044994         |                                 |
| C -0.030534 3.909531 0.283163         |                                 |
| C 1.454862 0.477908 0.247101          |                                 |
| C 0.613819 -0.701797 0.670628         |                                 |
| C -0.543823 -0.818294 -0.403708       |                                 |
| C -1.400713 0.423176 -0.309533        |                                 |
| S 1.746866 -2.129598 0.672828         |                                 |
| C 3.123885 -1.163072 0.217929         |                                 |
| C 2.814611 0.184009 0.026523          |                                 |
| C -2.790398 0.155223 -0.319079        |                                 |
| C -3.086908 -1.197319 -0.173077       |                                 |
| S -1.673095 -2.216841 -0.078681       |                                 |
| C 0.050477 -0.53046 2.093633          |                                 |
| C 0.018929 -0.974677 -1.830822        |                                 |
| F 2.217268 3.325658 0.827919          |                                 |
| F 1.671061 3.42913 -1.284303          |                                 |
| F -0.078526 4.117799 1.616221         |                                 |
| F -0.027253 5.104837 -0.330576        |                                 |
| F -1.694668 3.45799 -1.353326         |                                 |
| F -2.247828 3.199016 0.741356         |                                 |
| H 0.638275 -0.112046 -2.091475        |                                 |
| H 0.622844 -1.883758 -1.909218        |                                 |
| H -0.806425 -1.037429 -2.544201       |                                 |
| H -0.609054 0.340902 2.132498         |                                 |
| H -0.519752 -1.413684 2.394583        |                                 |
| H 0.869967 -0.381532 2.800828         |                                 |
| C 3.808522 1.180483 -0.503507         |                                 |
| H 3.328299 1.858526 -1.210861         |                                 |
| H 4.231939 1.791991 0.299113          |                                 |
| H 4.630102 0.678989 -1.018388         |                                 |
| C -3.857398 1.19628 -0.528984         |                                 |
| H -4.139208 1.691211 0.404481         |                                 |

|                  |             |             |             |                                          |             |             |             |
|------------------|-------------|-------------|-------------|------------------------------------------|-------------|-------------|-------------|
| H                | -3.507179   | 1.967213    | -1.216411   |                                          |             |             |             |
| H                | -4.753861   | 0.742833    | -0.957174   |                                          |             |             |             |
| C                | -4.400842   | -1.832639   | -0.063708   |                                          |             |             |             |
| C                | -4.640504   | -3.085627   | -0.65447    |                                          |             |             |             |
| C                | -5.438934   | -1.231975   | 0.669189    |                                          |             |             |             |
| C                | -5.87797    | -3.704459   | -0.530597   |                                          |             |             |             |
| H                | -3.856725   | -3.564942   | -1.234044   |                                          |             |             |             |
| C                | -6.675477   | -1.853562   | 0.788193    |                                          |             |             |             |
| H                | -5.264262   | -0.288481   | 1.174479    |                                          |             |             |             |
| C                | -6.901819   | -3.090321   | 0.187498    |                                          |             |             |             |
| H                | -6.0445     | -4.667929   | -1.002512   |                                          |             |             |             |
| H                | -7.462215   | -1.374548   | 1.362993    |                                          |             |             |             |
| H                | -7.868421   | -3.574969   | 0.283708    |                                          |             |             |             |
| C                | 4.416906    | -1.822943   | 0.055902    |                                          |             |             |             |
| C                | 4.503359    | -3.101703   | -0.522631   |                                          |             |             |             |
| C                | 5.601696    | -1.210394   | 0.500745    |                                          |             |             |             |
| C                | 5.731725    | -3.732085   | -0.670872   |                                          |             |             |             |
| H                | 3.602095    | -3.590269   | -0.882574   |                                          |             |             |             |
| C                | 6.827622    | -1.845953   | 0.350578    |                                          |             |             |             |
| H                | 5.553763    | -0.245296   | 0.993973    |                                          |             |             |             |
| C                | 6.899813    | -3.106617   | -0.238648   |                                          |             |             |             |
| H                | 5.778371    | -4.713618   | -1.132533   |                                          |             |             |             |
| H                | 7.730019    | -1.358352   | 0.70654     |                                          |             |             |             |
| H                | 7.859389    | -3.600386   | -0.356111   |                                          |             |             |             |
| <b>TS(AP-CF)</b> |             |             |             | <b>TS(<sup>3</sup>AP-<sup>3</sup>CF)</b> |             |             |             |
| C                | -2.71446900 | 0.15465200  | -0.25988800 | C                                        | 2.77527200  | 0.15649700  | 0.14803900  |
| C                | -1.34354000 | 0.43464900  | -0.49748600 | C                                        | 1.42124500  | 0.50687900  | 0.50098100  |
| C                | -0.52667100 | -0.74600100 | -0.73159400 | C                                        | 0.71363700  | -0.57920300 | 1.09053100  |
| S                | -1.59810900 | -2.15998100 | -0.72423300 | S                                        | 1.73851200  | -1.97881600 | 1.21553000  |
| C                | -3.00331400 | -1.19873800 | -0.34275000 | C                                        | 3.07554000  | -1.14594600 | 0.45852800  |
| C                | -0.62793300 | 1.66607000  | -0.20957300 | C                                        | 0.69843100  | 1.68290900  | 0.11271000  |
| C                | 0.65412700  | 1.69050300  | 0.28219700  | C                                        | -0.67546700 | 1.64431200  | -0.26203200 |
| C                | 1.05448200  | 3.10416800  | 0.59857600  | C                                        | -1.23990900 | 3.02890400  | -0.21574300 |
| C                | 0.11134200  | 3.94284000  | -0.28306600 | C                                        | 0.00320600  | 3.94010100  | -0.29910800 |
| C                | -1.15751900 | 3.06759000  | -0.35191000 | C                                        | 1.13753300  | 3.09789000  | 0.31669600  |
| C                | 1.40585200  | 0.47423700  | 0.58284500  | C                                        | -1.36733700 | 0.45542000  | -0.56804300 |
| C                | 0.60871800  | -0.68013300 | 0.95332700  | C                                        | -0.60923300 | -0.73181200 | -0.94582700 |
| S                | 1.68667900  | -2.08120400 | 1.03266600  | S                                        | -1.62527200 | -2.15577500 | -0.85746500 |
| C                | 3.03985200  | -1.18225700 | 0.39486200  | C                                        | -3.02531900 | -1.18781500 | -0.42071800 |
| C                | 2.72927100  | 0.15969700  | 0.19613500  | C                                        | -2.76250300 | 0.15558300  | -0.34416900 |
| C                | -0.40069800 | -0.62267900 | 2.08288600  | C                                        | 0.46884000  | -0.74291000 | -1.99181300 |
| F                | -1.84462300 | 3.26334900  | -1.49889800 | F                                        | 1.23800800  | 3.39456800  | 1.64784400  |
| F                | -1.96824700 | 3.44722600  | 0.67523100  | F                                        | 2.32515700  | 3.46274200  | -0.23062700 |
| F                | 0.64779700  | 4.06547800  | -1.51573300 | F                                        | -0.17009200 | 5.11814500  | 0.32114700  |
| F                | -0.12226400 | 5.16826900  | 0.20817400  | F                                        | 0.28459200  | 4.17754000  | -1.59898400 |
| F                | 0.81706700  | 3.39257600  | 1.90918800  | F                                        | -2.09917600 | 3.32469300  | -1.22243600 |
| F                | 2.34501900  | 3.42655700  | 0.36681500  | F                                        | -1.88926600 | 3.30929500  | 0.95621300  |
| C                | 0.46960300  | -0.76777800 | -1.87784700 | C                                        | -0.42405800 | -0.47881500 | 2.06989600  |
| H                | 1.18719500  | -1.58738600 | -1.77592700 | H                                        | -0.04291100 | -0.60964200 | 3.08785300  |
| H                | -0.06712000 | -0.89984000 | -2.82164600 | H                                        | -0.90001900 | 0.50057000  | 2.01379700  |
| H                | 1.01982500  | 0.17250800  | -1.93862600 | H                                        | -1.18189500 | -1.25081000 | 1.89381900  |
| H                | -0.95819500 | 0.31535400  | 2.06295200  | H                                        | 1.21986000  | -1.51519200 | -1.78813300 |
| H                | -1.11359700 | -1.45074600 | 2.02227200  | H                                        | 0.02925000  | -0.95363800 | -2.97376000 |
| H                | 0.11652500  | -0.68387000 | 3.04459300  | H                                        | 0.97046500  | 0.22359300  | -2.05276500 |
| C                | -4.28817600 | -1.88003600 | -0.11532500 | C                                        | 4.31139000  | -1.89445400 | 0.17560800  |
| C                | -4.37280900 | -2.97459600 | 0.75608400  | C                                        | 4.25985100  | -3.17643200 | -0.38830400 |
| C                | -5.44531000 | -1.46343300 | -0.78800100 | C                                        | 5.56195100  | -1.34004900 | 0.47890300  |
| C                | -5.58614900 | -3.62179600 | 0.96221200  | C                                        | 5.43012700  | -3.87817000 | -0.65470600 |
| H                | -3.48405400 | -3.30904800 | 1.28407900  | H                                        | 3.29804800  | -3.61846300 | -0.63325700 |
| C                | -6.65835500 | -2.10985000 | -0.57638900 | C                                        | 6.73100000  | -2.04297200 | 0.20823000  |
| H                | -5.38545200 | -0.64116600 | -1.49484700 | H                                        | 5.61363300  | -0.36087600 | 0.94485900  |
| C                | -6.73324100 | -3.18970100 | 0.30031800  | C                                        | 6.66886300  | -3.31280500 | -0.36057600 |
| H                | -5.63586200 | -4.46271000 | 1.64730100  | H                                        | 5.37328200  | -4.86687800 | -1.09953000 |
| H                | -7.54494400 | -1.77463000 | -1.10592800 | H                                        | 7.69201800  | -1.59903700 | 0.44891100  |
| H                | -7.68037000 | -3.69473900 | 0.46315400  | H                                        | 7.58234500  | -3.86066300 | -0.57052300 |
| C                | 4.28278600  | -1.88918800 | 0.06565400  | C                                        | -4.28444100 | -1.89460000 | -0.12033000 |
| C                | 4.25148700  | -3.15844900 | -0.53226400 | C                                        | -4.81166300 | -2.81956800 | -1.02997200 |
| C                | 5.53070500  | -1.31690900 | 0.35562400  | C                                        | -4.95127900 | -1.67847600 | 1.09216600  |
| C                | 5.43054800  | -3.82543000 | -0.84307500 | C                                        | -5.99102800 | -3.49764300 | -0.74121200 |
| H                | 3.29546400  | -3.61683900 | -0.76919600 | H                                        | -4.30351500 | -2.99434400 | -1.97413200 |

|                                      |                                       |
|--------------------------------------|---------------------------------------|
| C 6.70819300 -1.98484000 0.03890900  | C -6.12974800 -2.35909400 1.37881700  |
| H 5.57564900 -0.35262100 0.85183700  | H -4.53420800 -0.98478400 1.81612600  |
| C 6.66339600 -3.24021600 -0.56300200 | C -6.65346300 -3.26803900 0.46236400  |
| H 5.38499400 -4.80341300 -1.31242100 | H -6.39309500 -4.20565900 -1.45930000 |
| H 7.66398600 -1.52534200 0.27158100  | H -6.63484500 -2.18430500 2.32371000  |
| H 7.58386300 -3.76127000 -0.80770300 | H -7.57406900 -3.79792800 0.68678600  |
| C 3.65457300 1.09945700 -0.52996400  | C -3.81304500 1.16821500 0.01469500   |
| H 3.09016800 1.75739800 -1.19460700  | H -3.61685700 1.61310200 0.99489700   |
| H 4.22034400 1.73455000 0.15736400   | H -3.83390600 1.98082300 -0.71250000  |
| H 4.36948100 0.53707000 -1.13442000  | H -4.80137700 0.70715300 0.03821400   |
| C -3.72983500 1.17543900 0.17306200  | C 3.69003600 1.03452300 -0.65821800   |
| H -3.40854000 1.66739100 1.09416900  | H 3.12780700 1.55414300 -1.43846200   |
| H -3.86218400 1.95254100 -0.58479500 | H 4.17273800 1.79859700 -0.04290500   |
| H -4.69853200 0.711105200 0.35954200 | H 4.47182500 0.44026700 -1.13554100   |
| <b>TS(AP-P)</b>                      |                                       |
| C 2.47807 -0.22674 -0.26461          |                                       |
| C 1.84384 0.58886 0.73907            |                                       |
| C 2.4781 0.58796 1.94745             |                                       |
| S 3.84684 -0.46733 1.90128           |                                       |
| C 3.57839 -0.87368 0.2278            |                                       |
| C 0.71106 1.46432 0.38555            |                                       |
| C -0.61799 1.27709 0.15646           |                                       |
| C -1.1514 2.56747 -0.46778           |                                       |
| C 0.08041 3.41564 -0.84296           |                                       |
| C 1.15241 2.87921 0.09349            |                                       |
| C -1.5144 0.10176 0.35682            |                                       |
| C -1.10227 -1.12646 0.87258          |                                       |
| S -2.35736 -2.29593 0.81547          |                                       |
| C -3.49816 -1.17749 0.1803           |                                       |
| C -2.95016 0.06727 0.01633           |                                       |
| C 0.14475 -1.64674 1.53219           |                                       |
| F 1.19731 3.63278 1.22733            |                                       |
| F 2.37775 2.94353 -0.47066           |                                       |
| F -0.14471 4.73216 -0.72076          |                                       |
| F 0.43567 3.15435 -2.11803           |                                       |
| F -1.86539 2.35241 -1.59397          |                                       |
| F -1.91057 3.29277 0.39598           |                                       |
| C 2.0931 1.31018 3.20193             |                                       |
| H 2.00816 0.61922 4.04719            |                                       |
| H 2.83022 2.07501 3.46652            |                                       |
| H 1.12896 1.8056 3.06713             |                                       |
| H 0.47801 -0.97482 2.32335           |                                       |
| H -0.0638 -2.61695 1.99155           |                                       |
| H 0.96997 -1.78735 0.83205           |                                       |
| C 4.48703 -1.81734 -0.45182          |                                       |
| C 4.77595 -3.06319 0.11842           |                                       |
| C 5.08058 -1.48044 -1.6744           |                                       |
| C 5.63201 -3.95304 -0.52162          |                                       |
| H 4.31445 -3.33906 1.06259           |                                       |
| C 5.92966 -2.37555 -2.31782          |                                       |
| H 4.88503 -0.50578 -2.11161          |                                       |
| C 6.20831 -3.61348 -1.74336          |                                       |
| H 5.84258 -4.91666 -0.06777          |                                       |
| H 6.3827 -2.1003 -3.2654             |                                       |
| H 6.87411 -4.30924 -2.24478          |                                       |
| C -4.88233 -1.63251 -0.06979         |                                       |
| C -5.59869 -2.31126 0.92343          |                                       |
| C -5.49087 -1.41854 -1.3125          |                                       |
| C -6.89296 -2.76036 0.6815           |                                       |
| H -5.14254 -2.47522 1.89584          |                                       |
| C -6.78702 -1.86246 -1.55155         |                                       |
| H -4.9373 -0.90784 -2.09484          |                                       |
| C -7.49121 -2.53602 -0.55577         |                                       |
| H -7.43625 -3.28135 1.46408          |                                       |
| H -7.24508 -1.6891 -2.52058          |                                       |
| H -8.50192 -2.8853 -0.74379          |                                       |
| C -3.89823 1.19693 -0.32118          |                                       |
| H -3.6569 2.10994 0.21692            |                                       |
| H -3.92189 1.43061 -1.38683          |                                       |
| H -4.90836 0.90434 -0.02737          |                                       |

|   |         |          |          |
|---|---------|----------|----------|
| C | 1.90517 | -0.36777 | -1.64561 |
| H | 0.85926 | -0.69292 | -1.59412 |
| H | 1.91964 | 0.59225  | -2.17332 |
| H | 2.45991 | -1.09664 | -2.2393  |

S.26. GEOMETRIES : DTE-m5

| AP                           | <sup>3</sup> AP              |
|------------------------------|------------------------------|
| C -2.2989 -2.15363 0.21995   | C 0.0389 -3.21585 -0.11082   |
| C -0.98532 -2.30368 0.79163  | C -1.04008 -2.32421 -0.53944 |
| C -0.70665 -1.4089 1.79241   | C -0.53087 -1.12259 -1.09152 |
| S -2.05531 -0.37653 2.06833  | S 1.17899 -1.03457 -0.94277  |
| C -2.99705 -1.12771 0.81248  | C 1.26168 -2.62235 -0.20389  |
| C -0.0087 -3.31032 0.34691   | C -2.41434 -2.4979 -0.28252  |
| C 1.1885 -3.10239 -0.23164   | C -3.34223 -1.36107 -0.09924 |
| C 1.88454 -4.41384 -0.51247  | C -4.6404 -1.76309 -0.69576  |
| C 0.76617 -5.46784 -0.35023  | C -4.69336 -3.30166 -0.44236 |
| C -0.21704 -4.78085 0.61551  | C -3.20713 -3.75615 -0.22083 |
| C 1.77112 -1.81628 -0.64962  | C -3.00373 -0.18864 0.59767  |
| C 1.16894 -1.02012 -1.58976  | C -1.96378 -0.16444 1.56093  |
| S 2.09724 0.4067 -1.85645    | S -1.54038 1.44877 1.98368   |
| C 3.30107 -0.0584 -0.68814   | C -2.76938 2.11937 0.92875   |
| C 3.00247 -1.27288 -0.12775  | C -3.49493 1.15604 0.29694   |
| C -0.0965 -1.25402 -2.35405  | C -1.36828 -1.29276 2.34673  |
| F 0.11944 -5.08284 1.89825   | F -2.86601 -4.66622 -1.17009 |
| F -1.48194 -5.21073 0.42882  | F -3.1332 -4.41003 0.98177   |
| F 1.21463 -6.64914 0.09554   | F -5.25977 -3.96549 -1.46378 |
| F 0.15208 -5.65195 -1.53923  | F -5.42117 -3.53225 0.66809  |
| F 2.42763 -4.4482 -1.74707   | F -5.73239 -1.16881 -0.16554 |
| F 2.87643 -4.69307 0.37344   | F -4.69541 -1.55786 -2.05515 |
| C 0.55886 -1.25999 2.57876   | C -1.23033 -0.07635 -1.90579 |
| H 0.37418 -0.81673 3.56059   | H -0.67855 0.10475 -2.83398  |
| H 1.02727 -2.23689 2.72939   | H -2.23596 -0.40108 -2.17489 |
| H 1.27273 -0.61988 2.04703   | H -1.30623 0.87972 -1.37442  |
| H -0.96428 -0.862 -1.81124   | H -0.31423 -1.45651 2.09223  |
| H -0.06369 -0.77081 -3.33424 | H -1.41952 -1.07159 3.41805  |
| H -0.25152 -2.32452 -2.51227 | H -1.91251 -2.22143 2.17243  |
| C 3.81409 -1.92915 0.95423   | C -4.53716 1.4551 -0.74176   |
| H 3.17338 -2.48812 1.64074   | H -4.42276 0.79959 -1.60909  |
| H 4.53862 -2.6391 0.54206    | H -5.54813 1.30511 -0.35265  |
| H 4.36646 -1.18238 1.53039   | H -4.45432 2.48911 -1.0841   |
| C -2.78285 -2.97949 -0.94209 | C -0.18321 -4.58925 0.45272  |
| H -1.9428 -3.42805 -1.47745  | H -0.82492 -5.17946 -0.20365 |
| H -3.42488 -3.80361 -0.61715 | H 0.76425 -5.11954 0.56335   |
| H -3.35225 -2.36838 -1.64847 | H -0.6706 -4.54665 1.43235   |
| C 4.40877 0.86948 -0.39822   | C -2.81338 3.58432 0.77122   |
| C 4.13583 2.23619 -0.30425   | C -1.62393 4.27912 0.53133   |
| C 5.72695 0.43467 -0.21923   | C -4.01228 4.29855 0.86929   |
| H 3.12506 2.59364 -0.44146   | H -0.68639 3.74152 0.43712   |
| C 6.73 1.36004 0.0582        | C -4.0074 5.6829 0.72822     |
| H 5.97101 -0.61802 -0.32056  | H -4.93939 3.77273 1.07571   |
| C 6.43979 2.71921 0.14946    | C -2.81469 6.36491 0.50207   |
| H 7.75197 1.01738 0.1902     | H -4.93854 6.23463 0.81326   |
| H 7.23437 3.43103 0.35978    | H -2.81997 7.44802 0.40774   |
| C 5.13072 3.16576 -0.03296   | C -1.61326 5.66369 0.39966   |
| C 4.75852 4.62408 0.11892    | C -0.31555 6.3718 0.09385    |
| H 5.55484 5.27171 -0.27583   | H -0.32985 7.39763 0.49252   |
| H 4.65869 4.8481 1.18821     | H -0.20793 6.44752 -0.99645  |
| O 3.54963 4.86679 -0.56818   | O 0.75057 5.63936 0.65642    |
| C 2.66074 5.79938 -0.00035   | C 2.01685 5.86812 0.08444    |
| H 1.81335 5.82512 -0.69237   | H 2.71193 5.29759 0.70776    |
| H 3.0918 6.81225 0.02737     | H 2.30861 6.92801 0.15144    |
| C 2.18774 5.44254 1.41679    | C 2.12165 5.42647 -1.38048   |
| H 2.92862 5.74349 2.16219    | H 1.6657 6.16425 -2.04608    |
| H 1.27468 6.02056 1.62555    | H 3.18813 5.37797 -1.64677   |
| O 2.00384 4.06142 1.63787    | O 1.44499 4.22136 -1.66478   |
| C 1.03279 3.41572 0.84275    | C 1.88741 3.07238 -0.9704    |
| H 1.11765 2.35137 1.08536    | H 1.19047 2.27597 -1.24779   |
| H 1.25929 3.53477 -0.22616   | H 1.81028 3.21724 0.11587    |
| C -0.39607 3.87056 1.15118   | C 3.29724 2.63977 -1.38927   |
| H -0.4823 4.03441 2.22906    | H 3.36195 2.69746 -2.47983   |
| H -0.64214 4.81046 0.63887   | H 4.06503 3.30778 -0.9762    |
| O -1.35798 2.88012 0.84405   | O 3.55914 1.29466 -1.05181   |
| C -1.43704 2.46697 -0.50349  | C 3.88077 1.03554 0.29776    |
| H -2.29579 1.79053 -0.53567  | H 3.85152 -0.05512 0.39103   |

|                              |                              |
|------------------------------|------------------------------|
| H -0.55727 1.87198 -0.79705  | H 3.12506 1.43328 0.99107    |
| C -1.59641 3.58865 -1.53274  | C 5.24923 1.5701 0.7223      |
| H -0.63419 4.08137 -1.70826  | H 5.22241 2.65771 0.83825    |
| H -1.89183 3.11414 -2.48162  | H 5.47508 1.14968 1.71457    |
| O -2.47425 4.64016 -1.18585  | O 6.29164 1.333 -0.20072     |
| C -4.3308 -0.59784 0.4773    | C 2.57259 -3.0694 0.30483    |
| C -4.61254 0.77098 0.60694   | C 3.73634 -2.86585 -0.45085  |
| C -5.3476 -1.43795 0.00597   | C 2.69323 -3.62243 1.58385   |
| C -5.84469 1.30063 0.23108   | C 4.98855 -3.21828 0.04217   |
| H -3.85023 1.44106 1.0012    | H 3.65938 -2.42472 -1.44258  |
| C -6.57859 -0.91591 -0.37932 | C 3.94253 -3.98649 2.07938   |
| H -5.18627 -2.50809 -0.04518 | H 1.80991 -3.74251 2.20308   |
| C -6.82371 0.44793 -0.28296  | C 5.08528 -3.78599 1.31539   |
| H -7.3514 -1.58436 -0.7464   | H 4.02216 -4.4153 3.07356    |
| H -7.78254 0.85593 -0.59136  | H 6.06287 -4.04916 1.70932   |
| C -3.69329 4.29974 -0.55481  | C 6.42552 0.00826 -0.67615   |
| H -3.48894 3.77817 0.3867    | H 5.50669 -0.30927 -1.18541  |
| H -4.17264 5.25355 -0.31568  | H 7.22546 0.04078 -1.42142   |
| C -4.64976 3.49839 -1.44131  | C 6.82032 -0.97641 0.42631   |
| H -4.73549 3.99305 -2.41298  | H 7.68386 -0.57562 0.96417   |
| H -4.27452 2.4787 -1.61294   | H 6.00079 -1.10313 1.14841   |
| O -5.96073 3.46874 -0.90988  | O 7.23161 -2.23447 -0.07504  |
| C -6.11162 2.78541 0.32819   | C 6.23971 -2.96981 -0.77213  |
| H -5.47994 3.23059 1.10757   | H 5.97639 -2.48258 -1.72078  |
| H -7.15321 2.95924 0.61066   | H 6.72368 -3.91989 -1.01744  |
| <b>P</b>                     | <b>3P</b>                    |
| C -1.4929 -2.00021 0.13408   | C -1.33688 -2.20419 0.26271  |
| C -2.63049 -1.38067 -0.50329 | C -2.41702 -1.38844 -0.2916  |
| C -2.51632 -1.27598 -1.86552 | C -2.23749 -1.14104 -1.66235 |
| S -1.01615 -1.93287 -2.39597 | S -0.80694 -1.89138 -2.24791 |
| C -0.52195 -2.34363 -0.77602 | C -0.40225 -2.53933 -0.67581 |
| C -3.80201 -0.85454 0.21868  | C -3.46911 -0.8186 0.46565   |
| C -4.20203 0.4294 0.28036    | C -4.22384 0.41478 0.10762   |
| C -5.44953 0.57348 1.11288   | C -5.67376 0.12578 0.28665   |
| C -5.58562 -0.7951 1.8215    | C -5.7115 -1.11427 1.25059   |
| C -4.80443 -1.75192 0.89883  | C -4.22052 -1.43906 1.59095  |
| C -3.49368 1.58157 -0.30332  | C -3.61417 1.64249 -0.19811  |
| C -3.97896 2.36087 -1.32136  | C -4.17728 2.66061 -0.99914  |
| S -2.77587 3.49258 -1.83783  | S -2.98767 3.82669 -1.44305  |
| C -1.62436 2.91979 -0.6706   | C -1.74295 3.02739 -0.50969  |
| C -2.15321 1.91862 0.09694   | C -2.21893 1.92562 0.13199   |
| C -5.31361 2.31076 -2.0012   | C -5.55274 2.75833 -1.57507  |
| F -5.6533 -2.29245 -0.01635  | F -4.06416 -2.77252 1.73143  |
| F -4.26509 -2.77778 1.58937  | F -3.93222 -0.86781 2.80592  |
| F -6.85929 -1.16488 2.01255  | F -6.25476 -2.17665 0.62596  |
| F -4.96039 -0.73879 3.01707  | F -6.43599 -0.85288 2.35103  |
| F -5.34909 1.58322 2.00346   | F -6.37209 1.15096 0.83117   |
| F -6.56187 0.8036 0.36708    | F -6.32544 -0.21155 -0.87474 |
| C -3.49012 -0.70051 -2.84586 | C -3.12837 -0.42941 -2.63639 |
| H -3.50967 -1.27694 -3.775   | H -3.03275 -0.86776 -3.63395 |
| H -4.49686 -0.70751 -2.42005 | H -4.17491 -0.50274 -2.3355  |
| H -3.2337 0.33574 -3.0923    | H -2.86807 0.63218 -2.71288  |
| H -6.00103 3.05373 -1.58274  | H -6.2834 3.03329 -0.80799   |
| H -5.21945 2.50491 -3.07339  | H -5.59642 3.50675 -2.36991  |
| H -5.77249 1.32855 -1.87238  | H -5.8655 1.79677 -1.99134   |
| C -1.45645 1.28466 1.26783   | C -1.45044 1.20995 1.2137    |
| H -2.18139 1.00486 2.03842   | H -2.13534 0.84948 1.9861    |
| H -0.91251 0.38107 0.97735   | H -0.88483 0.35038 0.84472   |
| H -0.73545 1.9757 1.71135    | H -0.73849 1.89705 1.67879   |
| C -1.39041 -2.17836 1.6258   | C -1.18433 -2.48391 1.73307  |
| H -2.02865 -1.46152 2.14857  | H -1.58455 -1.65563 2.32401  |
| H -1.71257 -3.17677 1.93765  | H -1.71613 -3.38792 2.04238  |
| H -0.36324 -2.03279 1.97324  | H -0.13015 -2.60806 1.9942   |
| C 0.77639 -3.01839 -0.58267  | C 0.82102 -3.35229 -0.54256  |
| C 1.84273 -2.78726 -1.46266  | C 1.96983 -3.05994 -1.2907   |
| C 0.95083 -3.96592 0.43793   | C 0.827 -4.48207 0.2877      |
| C 3.03635 -3.50199 -1.36261  | C 3.09934 -3.87435 -1.22286  |
| H 1.74828 -2.03881 -2.24553  | H 1.99538 -2.18141 -1.93083  |
| C 2.15793 -4.63781 0.57974   | C 1.96269 -5.27586 0.38571   |
| H 0.13052 -4.20518 1.10404   | H -0.06845 -4.75273 0.8366   |



|                              |                             |
|------------------------------|-----------------------------|
| C 3.196 -4.41315 -0.32007    | C 3.09521 -4.97293 -0.36363 |
| H 2.27829 -5.36255 1.37924   | H 1.9591 -6.14255 1.03973   |
| H 4.13085 -4.95873 -0.21973  | H 3.97824 -5.60291 -0.28963 |
| C -0.23294 3.39972 -0.6215   | C -0.35456 3.51127 -0.47643 |
| C 0.11859 4.74989 -0.55801   | C -0.00461 4.8553 -0.31669  |
| C 0.77704 2.43191 -0.60327   | C 0.6587 2.55295 -0.57354   |
| C 1.46067 5.10824 -0.4446    | C 1.33854 5.21043 -0.21919  |
| H -0.65275 5.5147 -0.56926   | H -0.77661 5.6158 -0.23899  |
| C 2.11265 2.77924 -0.45595   | C 1.99785 2.89397 -0.4387   |
| H 0.51576 1.38313 -0.69815   | H 0.40094 1.51222 -0.73714  |
| C 2.45047 4.13198 -0.37364   | C 2.33408 4.23641 -0.25801  |
| H 1.73223 6.15794 -0.3837    | H 1.60822 6.25306 -0.08096  |
| H 3.4916 4.42297 -0.25211    | H 3.37698 4.52225 -0.14056  |
| O 6.06602 0.36529 -0.26311   | O 5.9043 0.43779 -0.41167   |
| C 6.79706 1.56271 -0.28619   | C 6.6424 1.61513 -0.61621   |
| H 7.84418 1.37131 -0.56989   | H 7.66782 1.37488 -0.93928  |
| H 6.37355 2.2674 -1.02217    | H 6.1792 2.2322 -1.40508    |
| C 6.73997 2.20029 1.08873    | C 6.68431 2.42303 0.66685   |
| H 5.69952 2.41173 1.35391    | H 5.66757 2.68032 0.97926   |
| H 7.28493 3.15403 1.05203    | H 7.22371 3.35836 0.46186   |
| O 7.34294 1.3628 2.05488     | O 7.36099 1.72201 1.69073   |
| C 6.52943 0.98193 3.14295    | C 6.61983 1.46384 2.86383   |
| H 6.0272 1.85418 3.58718     | H 6.1292 2.37692 3.23238    |
| H 7.22159 0.57907 3.88898    | H 7.36081 1.15786 3.60855   |
| C 5.49175 -0.08701 2.83369   | C 5.58705 0.35488 2.73879   |
| H 5.92926 -0.8247 2.14615    | H 6.00152 -0.44706 2.11177  |
| H 5.22499 -0.60096 3.77262   | H 5.38417 -0.05815 3.74137  |
| O 4.33589 0.48739 2.26221    | O 4.38889 0.84616 2.17668   |
| C 3.35755 -0.48157 1.96387   | C 3.44277 -0.18088 1.98942  |
| H 3.8037 -1.33002 1.4252     | H 3.90309 -1.03496 1.47312  |
| H 2.91659 -0.87902 2.8947    | H 3.07678 -0.54409 2.96561  |
| C 2.25154 0.11969 1.11841    | C 2.25486 0.3132 1.18508    |
| H 1.84583 1.01445 1.60994    | H 1.84121 1.22064 1.64592   |
| H 1.44609 -0.61924 1.03895   | H 1.48122 -0.4622 1.21233   |
| O 2.64994 0.40826 -0.20845   | O 2.53831 0.52873 -0.18544  |
| C 3.17853 1.70319 -0.40125   | C 3.05501 1.80933 -0.49036  |
| H 3.70901 1.66446 -1.35816   | H 3.45758 1.72512 -1.50558  |
| H 3.91511 1.93495 0.37278    | H 3.88515 2.05268 0.1763    |
| C 5.90257 -0.23474 -1.52345  | C 5.70789 -0.31038 -1.58535 |
| H 5.30047 0.40177 -2.1905    | H 5.11625 0.25805 -2.32064  |
| H 6.87424 -0.40807 -2.01109  | H 6.66846 -0.57065 -2.05655 |
| C 5.16546 -1.53591 -1.27337  | C 4.95205 -1.56139 -1.18154 |
| H 4.36283 -1.33118 -0.55923  | H 4.05908 -1.26417 -0.62414 |
| H 5.84656 -2.28223 -0.83434  | H 5.58643 -2.18232 -0.53049 |
| O 4.63311 -2.00217 -2.49401  | O 4.59615 -2.26787 -2.35325 |
| C 4.136 -3.31779 -2.39239    | C 4.30464 -3.62222 -2.11093 |
| H 4.95778 -4.01519 -2.16385  | H 5.18233 -4.12732 -1.67699 |
| H 3.75611 -3.56242 -3.389    | H 4.12591 -4.0637 -3.09725  |
| <b><sup>1</sup>p</b>         |                             |
| C -1.31634 -2.08739 0.20041  |                             |
| C -2.37694 -1.22682 -0.30762 |                             |
| C -2.09915 -0.79044 -1.63492 |                             |
| S -0.60312 -1.40065 -2.19428 |                             |
| C -0.31074 -2.28673 -0.70695 |                             |
| C -3.51967 -0.8085 0.4259    |                             |
| C -4.25064 0.41598 0.21192   |                             |
| C -5.69482 0.17784 0.43575   |                             |
| C -5.76154 -1.1931 1.1805    |                             |
| C -4.28014 -1.61807 1.40991  |                             |
| C -3.62524 1.64331 -0.12075  |                             |
| C -4.17113 2.67614 -0.9185   |                             |
| S -2.949 3.74538 -1.43869    |                             |
| C -1.70545 2.94307 -0.51481  |                             |
| C -2.21581 1.88992 0.18537   |                             |
| C -5.55143 2.80429 -1.47067  |                             |
| F -4.1542 -2.96152 1.27283   |                             |
| F -3.96597 -1.33571 2.72342  |                             |
| F -6.37087 -2.11979 0.4131   |                             |
| F -6.44925 -1.09063 2.33266  |                             |
| F -6.31126 1.1453 1.17063    |                             |

F -6.43808 0.07443 -0.7214  
C -2.96841 -0.06939 -2.61453  
H -2.95516 -0.57983 -3.58336  
H -4.00036 -0.02761 -2.26471  
H -2.61529 0.95777 -2.78458  
H -6.29725 2.76253 -0.67261  
H -5.6755 3.74791 -2.00768  
H -5.77328 1.98363 -2.16352  
C -1.47939 1.22252 1.32042  
H -2.19101 0.86922 2.07123  
H -0.87743 0.36592 1.00823  
H -0.80331 1.94162 1.79159  
C -1.25577 -2.55391 1.6286  
H -1.67964 -1.79333 2.28893  
H -1.82322 -3.47418 1.79279  
H -0.22176 -2.73254 1.934  
C 0.87504 -3.15355 -0.63328  
C 2.05614 -2.84284 -1.32601  
C 0.79891 -4.37341 0.05751  
C 3.13176 -3.72917 -1.34217  
H 2.14959 -1.89343 -1.84609  
C 1.88396 -5.23872 0.07725  
H -0.12258 -4.65825 0.55221  
C 3.04573 -4.91859 -0.61768  
H 1.8153 -6.17628 0.62016  
H 3.88642 -5.608 -0.61101  
C -0.29973 3.36639 -0.53454  
C 0.12077 4.69603 -0.43132  
C 0.6619 2.35578 -0.62012  
C 1.48184 4.98536 -0.37802  
H -0.61069 5.49646 -0.36218  
C 2.01873 2.63279 -0.52864  
H 0.34615 1.32491 -0.74243  
C 2.42695 3.96145 -0.40395  
H 1.80741 6.01697 -0.28384  
H 3.4856 4.19765 -0.32216  
O 6.02679 0.44563 -0.23559  
C 6.68377 1.68105 -0.36478  
H 7.7502 1.52808 -0.59278  
H 6.24502 2.27009 -1.18801  
C 6.53411 2.46538 0.92471  
H 5.47277 2.63486 1.13411  
H 7.01563 3.44411 0.78902  
O 7.15763 1.79303 2.00004  
C 6.33216 1.47859 3.10043  
H 5.75539 2.3564 3.42784  
H 7.02177 1.2106 3.90667  
C 5.38331 0.31021 2.88242  
H 5.89835 -0.46616 2.29906  
H 5.11585 -0.11473 3.86466  
O 4.21229 0.73009 2.21502  
C 3.31725 -0.33937 2.01206  
H 3.82852 -1.1867 1.53262  
H 2.92793 -0.69592 2.98154  
C 2.14229 0.09292 1.15538  
H 1.70304 1.01176 1.56679  
H 1.38207 -0.69461 1.19778  
O 2.44696 0.24836 -0.2187  
C 3.01512 1.49413 -0.578  
H 3.36784 1.35699 -1.60585  
H 3.88506 1.70982 0.04637  
C 5.90169 -0.25988 -1.44457  
H 5.3346 0.32641 -2.18482  
H 6.88713 -0.48487 -1.8806  
C 5.13969 -1.53156 -1.12271  
H 4.26961 -1.26699 -0.51463  
H 5.77767 -2.21966 -0.54751  
O 4.73118 -2.12521 -2.33853  
C 4.36189 -3.47335 -2.196  
H 5.2048 -4.05785 -1.79402  
H 4.17043 -3.83257 -3.21296

## CF

C 1.01055 4.55386 0.6564  
 C 0.56139 3.17679 0.26403  
 C -0.90604 3.11654 0.2724  
 C -1.44114 4.40653 0.81703  
 C -0.27756 5.41015 0.62722  
 C -1.57625 2.03609 -0.20255  
 C -0.72588 1.01438 -0.96607  
 C 0.57996 0.76504 -0.19183  
 C 1.32339 2.09127 -0.00784  
 S -1.77717 -0.48986 -1.11881  
 C -3.20838 0.42491 -0.65709  
 C -2.982 1.67991 -0.17905  
 C 2.76748 1.9215 -0.09297  
 C 3.10897 0.72814 -0.63968  
 S 1.76788 -0.31943 -1.09509  
 C -0.50837 1.57912 -2.38878  
 C 0.36522 0.15195 1.2113  
 F -2.53825 4.88476 0.18532  
 F -1.74434 4.33483 2.14556  
 F -0.3956 5.9735 -0.59383  
 F -0.27504 6.38182 1.55165  
 F 1.52232 4.59194 1.92001  
 F 1.93954 5.10161 -0.16374  
 H -0.3164 0.77263 1.80137  
 H -0.0326 -0.86308 1.14582  
 H 1.32773 0.10869 1.72875  
 H 0.04398 2.52213 -2.34628  
 H 0.04435 0.87552 -3.01387  
 H -1.48165 1.76752 -2.84887  
 C -4.05898 2.52621 0.44239  
 H -3.70644 2.95684 1.3833  
 H -4.36055 3.35392 -0.20454  
 H -4.94275 1.92291 0.65827  
 C 3.78218 2.91757 0.39437  
 H 3.907 3.74294 -0.31165  
 H 3.4771 3.34789 1.35064  
 H 4.75333 2.43518 0.52593  
 C 4.4737 0.20627 -0.86803  
 C 4.87534 -0.96119 -0.21705  
 C 5.36128 0.84549 -1.73828  
 C 6.13475 -1.51081 -0.43393  
 H 4.19762 -1.45128 0.47292  
 C 6.62501 0.30422 -1.95584  
 H 5.05388 1.7513 -2.25197  
 C 7.00688 -0.87215 -1.31581  
 H 7.30993 0.79452 -2.64072  
 H 7.98957 -1.29703 -1.50563  
 C -4.52251 -0.23051 -0.81478  
 C -4.73119 -1.52708 -0.3341  
 C -5.56682 0.4334 -1.46666  
 C -5.96326 -2.15568 -0.48363  
 H -3.92309 -2.06052 0.1533  
 C -6.79735 -0.19534 -1.62759  
 H -5.40718 1.43134 -1.86309  
 C -6.99528 -1.48289 -1.14009  
 H -7.60276 0.31933 -2.14252  
 H -7.95925 -1.9687 -1.27249  
 O 2.66809 -4.6034 0.45435  
 C 2.59282 -3.6922 1.53289  
 H 2.50395 -2.66163 1.15853  
 H 3.48983 -3.75161 2.16149  
 C 1.36518 -4.00811 2.35448  
 H 1.43898 -3.50197 3.33116  
 H 1.31572 -5.09225 2.54146  
 O 0.22291 -3.56996 1.65833  
 C -0.97663 -3.96466 2.2736  
 H -1.05718 -5.0644 2.28868  
 H -1.01733 -3.61806 3.32042  
 C -2.1353 -3.35162 1.51335  
 H -2.00112 -2.26521 1.47767

<sup>3</sup>CF

C 0.960673 4.771397 0.448618  
 C 0.476395 3.3684 0.232953  
 C -0.891658 3.337301 0.094409  
 C -1.488499 4.683281 0.36298  
 C -0.296039 5.661568 0.272686  
 C -1.601771 2.138984 -0.292621  
 C -0.71115 1.058107 -0.874071  
 C 0.498776 0.880095 0.101799  
 C 1.286191 2.179619 0.126445  
 S -1.781452 -0.431223 -0.992157  
 C -3.216114 0.47415 -0.567503  
 C -2.945048 1.802093 -0.180789  
 C 2.669311 2.022176 -0.004016  
 C 3.041264 0.712814 -0.34039  
 S 1.697277 -0.39647 -0.460072  
 C -0.260259 1.432568 -2.29893  
 C 0.051407 0.505086 1.527054  
 F -2.459333 5.039148 -0.509907  
 F -2.027227 4.771602 1.615026  
 F -0.280648 6.229728 -0.949092  
 F -0.359512 6.636582 1.193213  
 F 1.49093 4.962055 1.686906  
 F 1.903342 5.159829 -0.447092  
 H -0.667475 1.235695 1.909846  
 H -0.41184 -0.484792 1.537592  
 H 0.920219 0.48972 2.190209  
 H 0.345224 2.343703 -2.28181  
 H 0.3324 0.630388 -2.745862  
 H -1.138602 1.611313 -2.924109  
 C -4.021709 2.692992 0.380064  
 H -3.644172 3.269303 1.224666  
 H -4.38601 3.403709 -0.36738  
 H -4.870741 2.101659 0.727412  
 C 3.709741 3.086809 0.227694  
 H 3.861058 3.708303 -0.65884  
 H 3.420173 3.743451 1.048073  
 H 4.666787 2.626958 0.48235  
 C 4.390969 0.204945 -0.619846  
 C 4.817131 -1.009371 -0.069656  
 C 5.261262 0.898494 -1.474221  
 C 6.072667 -1.536229 -0.358986  
 H 4.164537 -1.553252 0.605165  
 C 6.519119 0.381981 -1.759736  
 H 4.938722 1.826033 -1.936002  
 C 6.922965 -0.833397 -1.212058  
 H 7.181104 0.920902 -2.430535  
 H 7.901904 -1.23965 -1.4544  
 C -4.521664 -0.184935 -0.654843  
 C -4.680588 -1.511502 -0.226118  
 C -5.625711 0.481055 -1.207687  
 C -5.904821 -2.161575 -0.335803  
 H -3.835337 -2.04654 0.194251  
 C -6.850807 -0.166524 -1.318806  
 H -5.514458 1.493901 -1.580864  
 C -6.992057 -1.481985 -0.889245  
 H -7.696177 0.353281 -1.759285  
 H -7.951411 -1.984419 -0.988336  
 O 2.749599 -4.906802 0.392752  
 C 2.712269 -4.175465 1.602399  
 H 2.730731 -3.095197 1.403896  
 H 3.578756 -4.417194 2.230643  
 C 1.433414 -4.507736 2.335922  
 H 1.503312 -4.146873 3.375746  
 H 1.300553 -5.600716 2.369414  
 O 0.355647 -3.894409 1.670517  
 C -0.893386 -4.290536 2.175946  
 H -1.022153 -5.381015 2.071697  
 H -0.977845 -4.053958 3.250644  
 C -1.988164 -3.552423 1.430737  
 H -1.792617 -2.476322 1.482831

|                                             |                                 |
|---------------------------------------------|---------------------------------|
| H -3.07747 -3.56503 2.0333                  | H -2.955436 -3.748075 1.90849   |
| O -2.18997 -3.77783 0.16637                 | O -2.031186 -3.87159 0.052639   |
| C -2.86844 -4.99561 -0.06269                | C -2.764101 -5.033113 -0.276478 |
| H -2.89049 -5.61863 0.84171                 | H -2.768248 -5.75307 0.553207   |
| H -2.3159 -5.54336 -0.83358                 | H -2.261861 -5.506305 -1.126779 |
| C -4.28258 -4.75114 -0.55067                | C -4.18985 -4.704232 -0.673486  |
| H -4.24859 -4.06265 -1.40579                | H -4.174798 -3.934977 -1.457123 |
| H -4.73954 -5.6954 -0.88523                 | H -4.684136 -5.600579 -1.080122 |
| O -5.03543 -4.19419 0.51179                 | O -4.882643 -4.241297 0.471046  |
| C -6.20738 -3.53757 0.0976                  | C -6.087536 -3.578333 0.179812  |
| H -6.8311 -3.44609 0.99342                  | H -6.646619 -3.550329 1.121348  |
| H -6.76614 -4.15269 -0.62457                | H -6.687828 -4.160064 -0.536977 |
| C 3.46029 -4.17996 -0.63071                 | C 3.411247 -4.277491 -0.678046  |
| H 3.2511 -3.12845 -0.8713                   | H 3.112008 -3.222097 -0.748785  |
| H 3.15237 -4.78902 -1.48814                 | H 3.071897 -4.785277 -1.587506  |
| C 4.95611 -4.38185 -0.43139                 | C 4.928077 -4.376744 -0.619107  |
| H 5.46456 -4.12932 -1.37201                 | H 5.337178 -3.932239 -1.536656  |
| H 5.15357 -5.43853 -0.21037                 | H 5.228743 -5.432227 -0.584912  |
| O 5.46618 -3.6029 0.64251                   | O 5.442408 -3.722263 0.532069   |
| C 6.54844 -2.76236 0.31643                  | C 6.510745 -2.839 0.282971      |
| H 7.00165 -2.48217 1.2736                   | H 6.958708 -2.635639 1.261622   |
| H 7.31245 -3.30831 -0.25668                 | H 7.283731 -3.318985 -0.335449  |
| <sup>13</sup> C                             |                                 |
| C 0.8813405926 5.0537269623 0.1412014433    |                                 |
| C 0.4102221881 3.6359958604 0.0604390332    |                                 |
| C -0.9878564826 3.5995889785 -0.0978589639  |                                 |
| C -1.5628546849 4.9645893988 0.0752949422   |                                 |
| C -0.368440826 5.9007340519 -0.2013059201   |                                 |
| C -1.6749109109 2.4072609123 -0.4335480186  |                                 |
| C -0.7821196239 1.3163263442 -0.9725113077  |                                 |
| C 0.4024572206 1.1690329979 0.0635975105    |                                 |
| C 1.1927730281 2.4575463021 0.0656539548    |                                 |
| S -1.8323275116 -0.1681930352 -1.0778857914 |                                 |
| C -3.2573525452 0.6882456239 -0.5514354186  |                                 |
| C -3.0158243076 2.0264614071 -0.2367556991  |                                 |
| C 2.5934223374 2.2622011142 0.0251707413    |                                 |
| C 2.9527245305 0.9450393814 -0.2499471206   |                                 |
| S 1.5898605922 -0.1354263359 -0.4065751836  |                                 |
| C -0.2661855752 1.6447375944 -2.3863405133  |                                 |
| C -0.1161907634 0.8592275271 1.4823855278   |                                 |
| F -2.5936614272 5.2474989414 -0.7571278543  |                                 |
| F -2.0129985337 5.204355906 1.3478248506    |                                 |
| F -0.3535407114 6.2101705267 -1.5155874258  |                                 |
| F -0.4227771489 7.0450984038 0.5007071723   |                                 |
| F 1.3351685155 5.4015428709 1.3803673914    |                                 |
| F 1.8784665361 5.356497697 -0.7322510653    |                                 |
| H -0.7725319148 1.661485241 1.8302848222    |                                 |
| H -0.6719362646 -0.0834475934 1.4919960584  |                                 |
| H 0.7284715981 0.7765764477 2.1706717151    |                                 |
| H 0.3325834663 2.5595855815 -2.3646945166   |                                 |
| H 0.3523838191 0.8304512446 -2.773362841    |                                 |
| H -1.1119435796 1.796786346 -3.0613307949   |                                 |
| C -4.056761554 2.9187223605 0.3814468747    |                                 |
| H -3.6060659892 3.5600515951 1.1405964875   |                                 |
| H -4.521836672 3.5721823631 -0.3630848852   |                                 |
| H -4.843469941 2.3308148564 0.8583653991    |                                 |
| C 3.6139626477 3.3314133883 0.3098203071    |                                 |
| H 3.8641023211 3.9107045912 -0.5835153804   |                                 |
| H 3.2381642716 4.0294253059 1.0589614648    |                                 |
| H 4.5339772852 2.8847926845 0.6935357234    |                                 |
| C 4.2891862375 0.3818836672 -0.4393225794   |                                 |
| C 4.5675900722 -0.9221256055 -0.000036285   |                                 |
| C 5.3029987924 1.0918372201 -1.105127811    |                                 |
| C 5.8101693021 -1.509123535 -0.2087731126   |                                 |
| H 3.8081637682 -1.4937859772 0.5255172356   |                                 |
| C 6.5483252943 0.5102911283 -1.3075859031   |                                 |
| H 5.1040196951 2.0812501784 -1.5012443181   |                                 |
| C 6.8044723481 -0.7858738247 -0.8678218486  |                                 |
| H 7.3188441491 1.0650631337 -1.8343656571   |                                 |
| H 7.7772808193 -1.2379061361 -1.0448077749  |                                 |

|                                             |                                          |
|---------------------------------------------|------------------------------------------|
| C -4.510900786 -0.0552552056 -0.4811706141  |                                          |
| C -4.5023416518 -1.4083910635 -0.1004840485 |                                          |
| C -5.7335433159 0.5293417621 -0.8496097354  |                                          |
| C -5.6651555398 -2.1663859839 -0.0976191656 |                                          |
| H -3.5705150216 -1.8782358223 0.2001398583  |                                          |
| C -6.9012539643 -0.2244087201 -0.8327605333 |                                          |
| H -5.7625990261 1.558479253 -1.1906453743   |                                          |
| C -6.8712743076 -1.5668416334 -0.4682377299 |                                          |
| H -7.8390363322 0.2350658863 -1.1298701789  |                                          |
| H -7.7878928787 -2.1518325115 -0.4763898257 |                                          |
| O 3.0567594827 -5.8912694485 0.364562973    |                                          |
| C 2.8990579512 -5.6156545102 1.7437914759   |                                          |
| H 3.3210163154 -4.6379510598 1.9977862837   |                                          |
| H 3.4663005101 -6.3805487456 2.2856374238   |                                          |
| C 1.4514710288 -5.692028054 2.1881822242    |                                          |
| H 1.4097901983 -5.6324819353 3.2893157195   |                                          |
| H 1.0226466152 -6.6612384876 1.887624163    |                                          |
| O 0.7206920386 -4.6361833802 1.6078884433   |                                          |
| C -0.6287258182 -4.6340304549 2.0014009759  |                                          |
| H -1.0669117882 -5.6358976774 1.8679884369  |                                          |
| H -0.7215660489 -4.3860736066 3.072285299   |                                          |
| C -1.3971676484 -3.5991181052 1.1998961484  |                                          |
| H -0.8840595959 -2.6359712926 1.2829726058  |                                          |
| H -2.4022389073 -3.4966361995 1.6251632019  |                                          |
| O -1.4580452081 -3.8730062286 -0.1894528816 |                                          |
| C -2.3203158814 -4.923156594 -0.5762748452  |                                          |
| H -2.3166856861 -5.741966314 0.1550937904   |                                          |
| H -1.9223047256 -5.3176446414 -1.5166738199 |                                          |
| C -3.7508773288 -4.4773310208 -0.8131474589 |                                          |
| H -3.756603695 -3.6048118982 -1.4806782185  |                                          |
| H -4.308205613 -5.2895752802 -1.306841012   |                                          |
| O -4.3503893214 -4.1687936188 0.4327748388  |                                          |
| C -5.6422781668 -3.6226504027 0.3301635487  |                                          |
| H -6.0858342066 -3.7168070863 1.3271837132  |                                          |
| H -6.2609458366 -4.219310662 -0.3582922495  |                                          |
| C 3.0080333524 -4.75772339 -0.4817206309    |                                          |
| H 2.3310174074 -3.9966486426 -0.0787563419  |                                          |
| H 2.5988334807 -5.0950648706 -1.4404293702  |                                          |
| C 4.3805010728 -4.1649659719 -0.7335839091  |                                          |
| H 4.2866814272 -3.3593839223 -1.4778100036  |                                          |
| H 5.0566011317 -4.9317941868 -1.1408156587  |                                          |
| O 4.9075482641 -3.6667444386 0.4826690578   |                                          |
| C 6.0795366579 -2.9069855312 0.3169018487   |                                          |
| H 6.5397426364 -2.8434054303 1.3087961338   |                                          |
| H 6.791767269 -3.4252519651 -0.3433252235   |                                          |
| <b>TS(AP-CF)</b>                            | <b>TS(<sup>3</sup>AP-<sup>3</sup>CF)</b> |
| C -2.75312 1.93311 0.79846                  | C -3.25775 1.05433 -0.4602               |
| C -2.59763 0.48837 0.78767                  | C -2.07839 1.84889 -0.70763              |
| C -1.17693 0.06473 0.82399                  | C -1.27364 1.31848 -1.74595              |
| S -0.16297 1.53109 0.83427                  | S -1.99601 -0.11368 -2.41009             |
| C -1.57461 2.61512 0.80376                  | C -3.32437 -0.04298 -1.2787              |
| C -3.50174 -0.50643 0.38301                 | C -1.54401 2.88718 0.13144               |
| C -3.13111 -1.73444 -0.16759                | C -0.15406 3.00151 0.41338               |
| C -4.28219 -2.51106 -0.6478                 | C 0.12614 4.36009 0.97155                |
| C -5.46597 -1.87943 0.1046                  | C -1.25279 4.86171 1.45547               |
| C -5.00968 -0.42455 0.33203                 | C -2.2651 4.12061 0.56129                |
| C -1.71394 -1.99027 -0.48701                | C 0.78273 1.98347 0.13995                |
| C -0.93152 -0.83656 -0.85328                | C 0.30494 0.61115 -0.03026               |
| S 0.74558 -1.34954 -1.03213                 | S 1.52428 -0.36788 -0.81213              |
| C 0.40124 -2.93372 -0.51243                 | C 2.67874 0.95653 -0.76642               |
| C -0.96815 -3.13631 -0.22579                | C 2.17307 2.11127 -0.21542               |
| C -1.39352 0.12977 -1.92735                 | C -0.59008 -0.08861 0.94674              |
| F -5.58562 0.10506 1.43201                  | F -2.56953 4.9141 -0.51211               |
| F -5.43046 0.3 -0.74639                     | F -3.43503 3.94827 1.22976               |
| F -5.63214 -2.49357 1.29709                 | F -1.37344 6.19782 1.38628               |
| F -6.62682 -1.95407 -0.56929                | F -1.43356 4.4824 2.73946                |
| F -4.50114 -2.40238 -2.00526                | F 1.00785 4.3783 2.00452                 |
| F -4.24161 -3.85935 -0.42382                | F 0.59618 5.24322 0.03753                |
| C -0.77512 -0.90452 1.93047                 | C -0.30389 2.07053 -2.61459              |
| H 0.21825 -1.3389 1.78026                   | H -0.75934 2.26504 -3.59083              |

|                 |          |          |          |   |          |          |          |
|-----------------|----------|----------|----------|---|----------|----------|----------|
| H               | -0.75594 | -0.34426 | 2.86829  | H | -0.04504 | 3.03089  | -2.16732 |
| H               | -1.50642 | -1.70801 | 2.03786  | H | 0.61729  | 1.50108  | -2.78323 |
| H               | -2.44119 | 0.38864  | -1.77107 | H | -1.18095 | -0.87109 | 0.45575  |
| H               | -0.80204 | 1.0503   | -1.89647 | H | 0.00849  | -0.58382 | 1.72121  |
| H               | -1.29256 | -0.32334 | -2.91734 | H | -1.26552 | 0.61407  | 1.43771  |
| C               | -1.30509 | 4.05886  | 0.74408  | C | -4.27531 | -1.16661 | -1.25001 |
| C               | -0.30744 | 4.55091  | -0.10964 | C | -3.79266 | -2.48052 | -1.26073 |
| C               | -2.00304 | 4.97428  | 1.54579  | C | -5.65772 | -0.94924 | -1.24306 |
| C               | -0.02176 | 5.91029  | -0.18606 | C | -4.66252 | -3.56512 | -1.27659 |
| H               | 0.27446  | 3.86388  | -0.71797 | H | -2.72402 | -2.67108 | -1.23495 |
| C               | -1.7333  | 6.3364   | 1.45981  | C | -6.53188 | -2.03215 | -1.24055 |
| H               | -2.73776 | 4.61345  | 2.25859  | H | -6.04376 | 0.06568  | -1.25871 |
| C               | -0.74509 | 6.80737  | 0.60052  | C | -6.03983 | -3.33482 | -1.26033 |
| H               | -2.28279 | 7.03187  | 2.08761  | H | -7.60372 | -1.85685 | -1.23387 |
| H               | -0.52606 | 7.87158  | 0.5525   | H | -6.73287 | -4.17297 | -1.26952 |
| C               | 1.50195  | -3.88434 | -0.33763 | C | 4.01501  | 0.69994  | -1.32838 |
| C               | 2.73575  | -3.43928 | 0.16075  | C | 4.65165  | -0.5111  | -1.02277 |
| C               | 1.34665  | -5.22964 | -0.69292 | C | 4.6489   | 1.60775  | -2.18367 |
| C               | 3.79815  | -4.32025 | 0.31494  | C | 5.92151  | -0.79753 | -1.50732 |
| H               | 2.86238  | -2.40341 | 0.45723  | H | 4.15171  | -1.23662 | -0.38806 |
| C               | 2.41332  | -6.10892 | -0.54729 | C | 5.91434  | 1.3161   | -2.68557 |
| H               | 0.40869  | -5.58038 | -1.10946 | H | 4.14605  | 2.52432  | -2.47628 |
| C               | 3.62821  | -5.66042 | -0.04071 | C | 6.55473  | 0.12915  | -2.3414  |
| H               | 2.29337  | -7.15065 | -0.82629 | H | 6.39892  | 2.0182   | -3.35796 |
| H               | 4.45125  | -6.36014 | 0.08144  | H | 7.54493  | -0.0827  | -2.73904 |
| C               | -1.50584 | -4.37179 | 0.43821  | C | 2.97852  | 3.37326  | -0.08193 |
| H               | -2.33484 | -4.10561 | 1.09705  | H | 2.67143  | 4.11829  | -0.82329 |
| H               | -1.88534 | -5.09574 | -0.28848 | H | 2.84433  | 3.82015  | 0.90292  |
| H               | -0.73058 | -4.85935 | 1.03357  | H | 4.04169  | 3.17123  | -0.22039 |
| C               | -4.08402 | 2.62743  | 0.70185  | C | -4.19847 | 1.27109  | 0.6906   |
| H               | -4.6683  | 2.23728  | -0.1318  | H | -3.64593 | 1.56468  | 1.58736  |
| H               | -4.67368 | 2.47846  | 1.61171  | H | -4.92129 | 2.06472  | 0.48153  |
| H               | -3.95694 | 3.69925  | 0.5466   | H | -4.75349 | 0.35645  | 0.91102  |
| O               | 2.02103  | 5.44541  | -1.45373 | O | 5.80224  | -2.97389 | -0.38295 |
| C               | 2.91815  | 5.20323  | -0.38833 | C | 5.85259  | -2.72889 | 1.00938  |
| C               | 3.69997  | 3.944    | -0.69407 | C | 4.6199   | -3.32392 | 1.66036  |
| H               | 3.60978  | 6.05301  | -0.27031 | H | 6.75326  | -3.18711 | 1.44467  |
| H               | 2.37796  | 5.06696  | 0.55793  | H | 5.88296  | -1.65097 | 1.21981  |
| O               | 2.85982  | 2.80595  | -0.62496 | O | 3.49324  | -2.61338 | 1.20328  |
| H               | 4.16775  | 4.03299  | -1.683   | H | 4.53447  | -4.39048 | 1.4007   |
| H               | 4.50316  | 3.83014  | 0.0451   | H | 4.73056  | -3.24632 | 2.75297  |
| C               | 2.56872  | 2.20872  | -1.87166 | C | 2.24418  | -3.0609  | 1.68285  |
| H               | 2.37923  | 2.98447  | -2.62572 | H | 2.1766   | -4.1574  | 1.61353  |
| H               | 1.64278  | 1.64335  | -1.72889 | H | 1.48969  | -2.63262 | 1.0197   |
| C               | 3.65881  | 1.26968  | -2.3736  | C | 1.95717  | -2.55344 | 3.10547  |
| H               | 4.6383   | 1.76482  | -2.30596 | H | 2.50382  | -1.61472 | 3.2355   |
| H               | 3.4675   | 1.05613  | -3.43356 | H | 2.3005   | -3.25996 | 3.8752   |
| O               | 3.67912  | 0.03216  | -1.68601 | O | 0.59707  | -2.23073 | 3.30217  |
| C               | 4.81049  | -0.23106 | -0.8842  | C | -0.30325 | -3.31355 | 3.43871  |
| H               | 4.86806  | -1.31688 | -0.77067 | H | 0.20772  | -4.27565 | 3.30034  |
| H               | 5.73379  | 0.10939  | -1.37627 | H | -0.71542 | -3.30179 | 4.45744  |
| C               | 4.70855  | 0.41969  | 0.494    | C | -1.45227 | -3.183   | 2.44731  |
| H               | 3.90947  | -0.05686 | 1.07553  | H | -1.81054 | -2.1499  | 2.45123  |
| H               | 4.44432  | 1.47511  | 0.38303  | H | -2.28368 | -3.8232  | 2.77616  |
| O               | 5.95297  | 0.3391   | 1.16938  | O | -1.07831 | -3.48681 | 1.11566  |
| C               | 6.03905  | -0.57287 | 2.2387   | C | -1.1768  | -4.86645 | 0.81035  |
| H               | 5.15892  | -0.49957 | 2.89385  | H | -0.8512  | -5.47495 | 1.66582  |
| H               | 6.917    | -0.26998 | 2.81842  | H | -0.48928 | -5.06002 | -0.01742 |
| C               | 6.23147  | -2.01989 | 1.82127  | C | -2.58246 | -5.28644 | 0.39719  |
| H               | 7.00573  | -2.07346 | 1.04044  | H | -2.73451 | -6.35586 | 0.60857  |
| H               | 6.57898  | -2.60576 | 2.68732  | H | -3.32298 | -4.72034 | 0.98076  |
| O               | 5.00987  | -2.54176 | 1.34497  | O | -2.75161 | -5.05349 | -0.98751 |
| C               | 5.12936  | -3.84876 | 0.84779  | C | -4.09951 | -4.97006 | -1.39073 |
| H               | 5.88091  | -3.88248 | 0.04143  | H | -4.72489 | -5.68136 | -0.83153 |
| H               | 5.47786  | -4.53283 | 1.63838  | H | -4.1213  | -5.27874 | -2.44198 |
| C               | 1.04015  | 6.41021  | -1.14781 | C | 6.60117  | -2.11297 | -1.15982 |
| H               | 1.50701  | 7.32292  | -0.74568 | H | 7.56234  | -1.91601 | -0.66054 |
| H               | 0.5783   | 6.67454  | -2.10488 | H | 6.82619  | -2.65644 | -2.08373 |
| <b>TS(AP-P)</b> |          |          |          |   |          |          |          |
| C               | -3.02484 | 1.33178  | -0.23652 |   |          |          |          |

C -3.42406 0.38244 0.771  
C -3.72686 0.94037 1.97952  
S -3.4504 2.64817 1.93216  
C -2.96137 2.60379 0.26162  
C -3.54596 -1.04905 0.44004  
C -2.63703 -2.04672 0.26441  
C -3.37582 -3.22366 -0.37676  
C -4.73321 -2.66679 -0.8513  
C -4.94589 -1.47636 0.07592  
C -1.15853 -2.09494 0.43404  
C -0.35232 -1.00286 0.74455  
S 1.29626 -1.33976 0.43319  
C 0.99893 -2.99004 0.0263  
C -0.33573 -3.28383 0.13615  
C -0.54502 0.34878 1.37641  
F -5.65907 -1.86499 1.16987  
F -5.65207 -0.49637 -0.52771  
F -5.7121 -3.58194 -0.80217  
F -4.61904 -2.22393 -2.12096  
F -2.72669 -3.73327 -1.4467  
F -3.62536 -4.23461 0.49592  
C -4.15626 0.25659 3.24081  
H -3.38425 0.3314 4.0148  
H -5.07483 0.69569 3.64217  
H -4.34565 -0.8012 3.0478  
H -1.28486 0.30813 2.17399  
H 0.40013 0.67235 1.82237  
H -0.85032 1.11596 0.66313  
C -2.40428 3.80934 -0.38625  
C -1.27105 4.42465 0.16265  
C -2.93953 4.31558 -1.573  
C -0.67418 5.5205 -0.45347  
H -0.8386 4.02117 1.07612  
C -2.34063 5.40629 -2.20022  
H -3.82293 3.8525 -2.00232  
C -1.21504 6.00581 -1.64663  
H -2.76027 5.79162 -3.12453  
H -0.7423 6.84904 -2.14139  
C 2.17112 -3.80088 -0.35943  
C 3.44483 -3.38937 0.04709  
C 2.08503 -4.89336 -1.23588  
C 4.60493 -3.9808 -0.44361  
H 3.55856 -2.55709 0.73618  
C 3.23757 -5.53793 -1.67151  
H 1.12088 -5.21778 -1.61112  
C 4.49862 -5.07445 -1.2976  
H 3.15247 -6.38129 -2.35006  
H 5.39341 -5.54709 -1.69356  
C -0.76599 -4.73231 0.18902  
H -1.56638 -4.87143 0.91452  
H -1.11183 -5.1301 -0.76612  
H 0.0804 -5.33933 0.51916  
C -2.62075 0.90418 -1.61784  
H -1.79643 0.18204 -1.5728  
H -3.45362 0.4114 -2.13028  
H -2.29833 1.75395 -2.22254  
C 5.91518 -3.31146 -0.10923  
H 6.7688 -3.85604 -0.53863  
H 6.04768 -3.26694 0.97936  
O 5.82773 -2.00526 -0.6558  
C 6.78813 -1.07083 -0.22746  
H 6.55306 -0.16067 -0.78877  
H 7.8094 -1.37498 -0.50786  
C 6.77504 -0.7821 1.27985  
H 7.32609 -1.5519 1.82737  
H 7.30316 0.16989 1.444  
O 5.49364 -0.77629 1.87227  
C 4.5169 0.06391 1.29322  
H 3.59952 -0.14194 1.85276  
H 4.34356 -0.21896 0.24657  
C 4.81079 1.56194 1.43141

|   |         |         |          |
|---|---------|---------|----------|
| H | 5.25234 | 1.74173 | 2.41577  |
| H | 5.52461 | 1.91168 | 0.672    |
| O | 3.62569 | 2.33678 | 1.40151  |
| C | 2.85327 | 2.2512  | 0.22213  |
| H | 1.96993 | 2.86768 | 0.41831  |
| H | 2.48836 | 1.22955 | 0.04154  |
| C | 3.56266 | 2.71552 | -1.04606 |
| H | 4.35465 | 2.01183 | -1.32111 |
| H | 2.82462 | 2.69629 | -1.86252 |
| O | 4.20507 | 3.96938 | -0.94766 |
| C | 3.42708 | 5.03349 | -0.43694 |
| H | 3.10638 | 4.82374 | 0.59251  |
| H | 4.09821 | 5.89548 | -0.40038 |
| C | 2.2246  | 5.38688 | -1.31633 |
| H | 2.57179 | 5.6588  | -2.31743 |
| H | 1.53788 | 4.53578 | -1.42268 |
| O | 1.5383  | 6.50917 | -0.79119 |
| C | 0.54401 | 6.18187 | 0.16037  |
| H | 0.94853 | 5.54256 | 0.95837  |
| H | 0.26186 | 7.13453 | 0.6194   |
